# Supplementary material for: 2-(Pyridinium-1-yl)-1,1-bis(triflyl)ethanides: structural behaviour and availability as bis(triflyl)ethylating reagents
Source: Royal Society of Chemistry journal article supplement (doi:10.1039/c3cc46171h), 2013-01-01
Supplement: c3cc46171h.pdf [file c3cc46171h.pdf]

# 2-(Pyridinium-1-yl)-1,1-bis(triflyl)ethanides: Structural Behaviour and Availability as Bis(triflyl)ethylating Reagents

Hikaru Yanai,<sup>\*</sup> Yoichi Takahashi, Haruhiko Fukaya, Yasuo Dobashi and Takashi Matsumoto

*School of Pharmacy, Tokyo University of Pharmacy and Life Sciences,*

*1432-1 Horinouchi, Hachioji, Tokyo 192-0392, Japan.*

*Tel.: +81 426 76 3265, Fax: +81 426 76 3257, E-mail: yanai@toyaku.ac.jp*

## Electronic Supplementary Information

### Table of contents

|                                                                   |        |
|-------------------------------------------------------------------|--------|
| 1. General and materials                                          | p. S1  |
| 2. Synthesis of 2-(pyridinium-1-yl)-1,1-bis(triflyl)ethanides     | p. S1  |
| 3. Bis(triflyl)ethylation reaction                                | p. S7  |
| 4. Computational methods                                          | p. S8  |
| 5. X-ray crystallographic data                                    | p. S9  |
| 6. <sup>1</sup> H and <sup>13</sup> C NMR spectra of all products | p. S24 |
| 7. References                                                     | p. S37 |

### 1. General and materials

All reactions were carried out under Ar atmosphere. Melting points were uncorrected. NMR spectra were recorded on a Bruker Avance II Nanobay 400 MHz spectrometer (400 MHz for <sup>1</sup>H, 100 MHz for <sup>13</sup>C, and 376 MHz for <sup>19</sup>F) in [D<sub>6</sub>]acetone, [D<sub>3</sub>]acetonitrile, and CDCl<sub>3</sub>. Chemical shifts (in ppm) were referenced to the solvent signal ([D<sub>6</sub>]acetone, 1.93 ppm for <sup>1</sup>H NMR and 29.3 ppm for <sup>13</sup>C NMR; [D<sub>3</sub>]acetonitrile, 2.00 ppm for <sup>1</sup>H NMR and 118.2 ppm for <sup>13</sup>C NMR; CDCl<sub>3</sub>, 7.26 ppm for <sup>1</sup>H NMR and 77.0 ppm for <sup>13</sup>C NMR). Chemical shifts (in ppm) of <sup>19</sup>F NMR spectra were referenced to the signal of trifluoromethylbenzene (0 ppm) as a standard. Coupling constants (*J*) are given in Hz. Mass spectra were measured on a MICROMASS LCT mass spectrometer using electrospray ionization-time of flight (ESI-TOF). Column chromatography was performed on neutral silica gel (75-150 μm). Tf<sub>2</sub>CH<sub>2</sub> **3** was kindly provided by Central Glass Co., Ltd. and this compound can be also prepared by the Waller's procedure in the laboratory.<sup>1</sup>

### 2. Synthesis of 2-(pyridinium-1-yl)-1,1-bis(triflyl)ethanides

#### 2-(Pyridin-1-ium-1-yl)-1,1-bis((trifluoromethyl)sulfonyl)ethan-1-ide (**2a**)

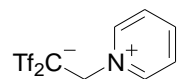

**2a**

To a solution of Tf<sub>2</sub>CH<sub>2</sub> **3** (279 mg, 0.996 mmol) in 1,2-dichloroethane (6.0 mL), paraformaldehyde (90%

purity, 69.8 mg, 2.09 mmol) and pyridine (165  $\mu$ L, 2.05 mmol) were added at room temperature. After being stirred for 4 h at 60  $^{\circ}$ C, the reaction mixture was concentrated under reduced pressure. The resulting residue was washed with  $\text{CHCl}_3$  (1.0 mL x 3) to give zwitterion **2a** in 99.6% yield (368 mg, 0.991 mmol). The structure of this compound was also confirmed by an X-ray crystallographic analysis. Colorless crystals ( $\text{CH}_3\text{CN}$ /hexane); Mp. 172-174  $^{\circ}$ C; IR (ATR)  $\nu$  3081, 1344, 1177, 1097, 1047, 856, 791, 597  $\text{cm}^{-1}$ ;  $^1\text{H}$  NMR (400 MHz)  $\delta$  in  $[\text{D}_3]$ acetonitrile 5.53 (2H, s), 8.01-8.21 (2H, m), 8.55 (1H, t,  $J = 7.8$  Hz), 8.97 (2H, t,  $J = 5.8$  Hz),  $\delta$  in  $[\text{D}_6]$ acetone 5.58 (2H, s), 8.21-8.28 (2H, m), 8.70 (1H, t,  $J = 7.8$  Hz), 9.09 (2H, t,  $J = 5.7$  Hz);  $^{13}\text{C}$  NMR (100 MHz)  $\delta$  in  $[\text{D}_3]$ acetonitrile 62.5, 68.9, 121.6 (q,  $J_{\text{CF}} = 325$  Hz), 129.0, 144.7, 147.0, in  $[\text{D}_6]$ acetone 63.5, 70.1, 122.4 (q,  $J_{\text{CF}} = 325$  Hz), 129.7, 145.6, 147.7;  $^{19}\text{F}$  NMR (376 Hz,  $[\text{D}_3]$ acetonitrile)  $\delta$  -17.7 (6F, s); MS (ESI-TOF)  $m/z$  372  $[\text{M}+\text{H}]^+$ ; HRMS calcd for  $\text{C}_9\text{H}_7\text{F}_6\text{NO}_4\text{S}_2$   $[\text{M}+\text{H}]^+$ , 371.9799; found, 371.9789; Anal. Calcd for  $\text{C}_9\text{H}_7\text{F}_6\text{NO}_4\text{S}_2$ : C, 29.11; H, 1.90; N, 3.77. Found: C, 29.05; H, 2.13; N, 3.89.

## 2-(2-Methylpyridin-1-ium-1-yl)-1,1-bis((trifluoromethyl)sulfonyl)ethan-1-ide (2b)

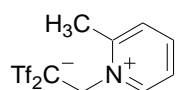

**2b**

To a solution of  $\text{Tf}_2\text{CH}_2$  **3** (281 mg, 1.00 mmol) in 1,2-dichloroethane (6.0 mL), paraformaldehyde (90% purity, 69.5 mg, 2.09 mmol) and 2-methylpyridine (200  $\mu$ L, 2.04 mmol) were added at room temperature. After being stirred for 4 h at 60  $^{\circ}$ C, the reaction mixture was concentrated under reduced pressure. The resulting residue was washed with  $\text{CHCl}_3$  (1.0 mL x 3) to give zwitterion **2b** in 97% yield (374 mg, 0.971 mmol). The structure of this compound was also confirmed by an X-ray crystallographic analysis. Colorless crystals ( $\text{CH}_3\text{CN}$ /hexane); Mp. 185-187  $^{\circ}$ C; IR (ATR)  $\nu$  3081, 1344, 1176, 1097, 1047, 856, 791, 597  $\text{cm}^{-1}$ ;  $^1\text{H}$  NMR (400 MHz,  $[\text{D}_3]$ acetonitrile)  $\delta$  2.94 (3H, s), 5.47 (2H, brs), 7.85 (1H, d,  $J = 7.9$  Hz), 7.92-7.97 (1H, m), 8.33-8.39 (1H, m), 9.22 (1H, d,  $J = 6.2$  Hz);  $^{13}\text{C}$  NMR (100 MHz,  $[\text{D}_3]$ acetonitrile)  $\delta$  20.8, 57.6, 67.6, 121.6 (q,  $J_{\text{CF}} = 326$  Hz), 126.6, 130.6, 144.0, 146.1, 156.3;  $^{19}\text{F}$  NMR (376 Hz,  $[\text{D}_3]$ acetonitrile)  $\delta$  -17.6 (6F, s); MS (ESI-TOF)  $m/z$  386  $[\text{M}+\text{H}]^+$ ; HRMS calcd for  $\text{C}_{10}\text{H}_{10}\text{F}_6\text{NO}_4\text{S}_2$   $[\text{M}+\text{H}]^+$ , 385.9955; found, 385.9946; Anal. Calcd for  $\text{C}_{10}\text{H}_9\text{F}_6\text{NO}_4\text{S}_2$ : C, 31.17; H, 2.35; N, 3.64. Found: C, 31.41; H, 2.65; N, 3.65.

## 2-(2-Ethylpyridin-1-ium-1-yl)-1,1-bis((trifluoromethyl)sulfonyl)ethan-1-ide (2c)

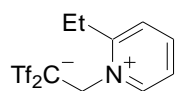

**2c**

To a solution of  $\text{Tf}_2\text{CH}_2$  **3** (281 mg, 1.00 mmol) in 1,2-dichloroethane (6.0 mL), paraformaldehyde (90% purity, 71.3 mg, 2.14 mmol) and 2-ethylpyridine (180  $\mu$ L, 1.57 mmol) were added at room temperature. After being stirred for 8 h at 60  $^{\circ}$ C, the reaction mixture was concentrated under reduced pressure. The resulting residue was washed with  $\text{CHCl}_3$  to give zwitterion **2c** in 97% yield (387 mg, 0.969 mmol). The structure of this compound was also confirmed by an X-ray crystallographic analysis. Colorless crystals ( $\text{CH}_3\text{CN}$ /hexane); Mp. 157-158  $^{\circ}$ C; IR (ATR)  $\nu$  1345, 1178, 1098, 1049, 856, 600  $\text{cm}^{-1}$ ;  $^1\text{H}$  NMR (400 MHz,  $[\text{D}_3]$ acetonitrile)  $\delta$  1.42 (3H, t,  $J = 7.5$  Hz), 3.30 (2H, q,  $J = 7.5$  Hz), 5.51 (2H, brs), 7.89 (1H, d,  $J = 8.0$  Hz), 7.92-7.97 (1H, m),

8.38-8.44 (1H, m), 9.24 (1H, d,  $J = 6.4$  Hz);  $^{13}\text{C}$  NMR (100 MHz,  $[\text{D}_3]\text{acetonitrile}$ )  $\delta$  12.6, 26.7, 57.1, 67.6, 121.6 (q,  $J_{\text{CF}} = 326$  Hz), 126.4, 128.7, 144.0, 146.3, 160.8;  $^{19}\text{F}$  NMR (376 Hz,  $[\text{D}_3]\text{acetonitrile}$ )  $\delta$  -17.6 (6F, s); MS (ESI-TOF)  $m/z$  422  $[\text{M}+\text{Na}]^+$ ; HRMS calcd for  $\text{C}_{11}\text{H}_{11}\text{F}_6\text{NNaO}_4\text{S}_2$   $[\text{M}+\text{Na}]^+$ , 421.9331; found, 421.9920; Anal. Calcd for  $\text{C}_{11}\text{H}_{11}\text{F}_6\text{NO}_4\text{S}_2$ : C, 33.08; H, 2.78; N, 3.51. Found: C, 32.82; H, 2.94; N, 3.58.

### 2-(2-Isobutylpyridin-1-ium-1-yl)-1,1-bis((trifluoromethyl)sulfonyl)ethan-1-ide (2d)

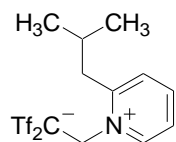

**2d**

To a solution of  $\text{Tf}_2\text{CH}_2$  **3** (280 mg, 1.00 mmol) in 1,2-dichloroethane (6.0 mL), paraformaldehyde (90% purity, 70.2 mg, 2.11 mmol) and 2-isobutylpyridine (301  $\mu\text{L}$ , 2.03 mmol) were added at room temperature. After being stirred for 6 h at 60  $^\circ\text{C}$ , the reaction mixture was concentrated under reduced pressure. The resulting residue was washed with  $\text{CHCl}_3$  to give zwitterion **2d** in 96% yield (412 mg, 0.964 mmol). The structure of this compound was also confirmed by an X-ray crystallographic analysis. Colorless crystals ( $\text{CH}_3\text{CN}/\text{hexane}$ ); Mp. 175-176  $^\circ\text{C}$ ; IR (ATR)  $\nu$  3071, 1347, 1193, 1167, 1055, 885, 598  $\text{cm}^{-1}$ ;  $^1\text{H}$  NMR (400 MHz,  $[\text{D}_3]\text{acetonitrile}$ )  $\delta$  1.04 (6H, d,  $J = 6.6$  Hz), 2.17 (1H, sep,  $J = 6.6$  Hz), 3.18 (2H, brs), 5.53 (2H, brs), 7.83 (1dH, d,  $J = 7.6$  Hz), 7.90-7.98 (1H, m), 8.35-8.41 (1H, m), 9.27 (1H, d,  $J = 6.4$  Hz);  $^{13}\text{C}$  NMR (100 MHz,  $[\text{D}_3]\text{acetonitrile}$ )  $\delta$  22.2, 29.1, 41.8, 57.5, 68.1, 121.6 (q,  $J_{\text{CF}} = 326$  Hz), 126.7, 130.7, 144.5, 145.8, 158.6;  $^{19}\text{F}$  NMR (376 Hz,  $[\text{D}_3]\text{acetonitrile}$ )  $\delta$  -17.6 (6F, s); MS (ESI-TOF)  $m/z$  450  $[\text{M}+\text{Na}]^+$ , 136  $[\text{M}-\text{C}_4\text{H}_2\text{F}_6\text{O}_4\text{S}_2+\text{H}]^+$ ; HRMS calcd for  $\text{C}_{13}\text{H}_{15}\text{F}_6\text{NNaO}_4\text{S}_2$   $[\text{M}+\text{Na}]^+$ , 450.0244; found, 450.0257; Anal. Calcd for  $\text{C}_{13}\text{H}_{15}\text{F}_6\text{NO}_4\text{S}_2$ : C, 36.53; H, 3.54; N, 3.28. Found: C, 36.40; H, 3.48; N, 3.20.

### 2-(2-Isopropylpyridin-1-ium-1-yl)-1,1-bis((trifluoromethyl)sulfonyl)ethan-1-ide (2e)

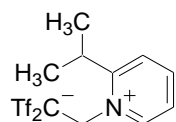

**2e**

A mixture of  $\text{Tf}_2\text{CH}_2$  **3** (55.6 mg, 0.198 mmol), paraformaldehyde (90% purity, 13.8 mg, 0.414 mmol), and water (36  $\mu\text{L}$ , 0.20 mmol) in chloroform (1.5 mL) was stirred for 6 h at room temperature. After the resulting mixture was treated with 2-isopropylpyridine (33  $\mu\text{L}$ , 0.40 mmol) for 2 h at room temperature, this mixture was concentrated under reduced pressure. The residue was purified by washing with hexane (1.0 mL x 3) followed by  $\text{Et}_2\text{O}$  (1.5 mL) to give zwitterion **2e** in 53% yield (43.8 mg, 0.106 mmol). The structure of this compound was also confirmed by an X-ray crystallographic analysis. Colorless crystals ( $\text{CH}_3\text{CN}/\text{hexane}$ ); Mp. 184-186  $^\circ\text{C}$ ; IR (ATR)  $\nu$  1334, 1189, 1167, 1056, 860, 599  $\text{cm}^{-1}$ ;  $^1\text{H}$  NMR (400 MHz,  $[\text{D}_3]\text{acetonitrile}$ )  $\delta$  1.43 (6H, d,  $J = 6.8$  Hz), 3.94 (1H, sep,  $J = 6.8$  Hz), 5.59 (2H, brs), 7.85-7.96 (1H, m), 7.98 (1H, d,  $J = 8.2$  Hz), 8.40-8.48 (1H, m), 9.23 (1H, d,  $J = 5.8$  Hz);  $^{13}\text{C}$  NMR (100 MHz,  $[\text{D}_3]\text{acetonitrile}$ )  $\delta$  22.0, 30.6, 57.1, 67.9, 121.6 (q,  $J_{\text{CF}} = 326$  Hz), 126.2, 126.4, 144.1, 146.5, 165.1;  $^{19}\text{F}$  NMR (376 Hz,  $[\text{D}_3]\text{acetonitrile}$ )  $\delta$  -17.6 (6F, s); MS (ESI-TOF)  $m/z$  436  $[\text{M}+\text{Na}]^+$ , 122  $[\text{M}-\text{C}_4\text{H}_2\text{F}_6\text{O}_4\text{S}_2+\text{H}]^+$ ; HRMS calcd for  $\text{C}_{12}\text{H}_{14}\text{F}_6\text{NNaO}_4\text{S}_2$

$[M+Na]^+$ , 436.0088; found, 436.0091. Anal. Calcd for  $C_{12}H_{13}F_6NO_4S_2$ : C, 34.87; H, 3.17; N, 3.39. Found: C, 34.69; H, 3.33; N, 3.39.

**2-(2-Methoxypyridin-1-ium-1-yl)-1,1-bis((trifluoromethyl)sulfonyl)ethan-1-ide (2f)**

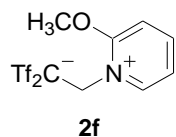

To a solution of  $Tf_2CH_2$  **3** (289 mg, 1.03 mmol) in 1,2-dichloroethane (6.0 mL), paraformaldehyde (90% purity, 72.0 mg, 2.16 mmol) and 2-methoxypyridine (216  $\mu$ L, 2.00 mmol) were added at room temperature. After being stirred for 5 h at 60 °C, the reaction mixture was concentrated under reduced pressure. The resulting residue was washed with  $CHCl_3$  (2.0 mL x 3) to give zwitterion **2f** in 99% yield (408 mg, 1.02 mmol). The structure of this compound was also confirmed by an X-ray crystallographic analysis. Colorless crystals ( $CH_3CN$ /hexane); Mp. 180-182 °C; IR (ATR)  $\nu$  1700, 1584, 1323, 1166, 1104, 1039, 859, 587  $cm^{-1}$ ;  $^1H$  NMR (400 MHz,  $[D_3]$ acetonitrile)  $\delta$  4.27 (3H, s), 5.40 (2H, brs), 7.50 (1H, d,  $J = 8.8$  Hz), 7.52-7.59 (1H, m), 8.40-8.45 (1H, m), 8.81 (1H, d,  $J = 6.0$  Hz);  $^{13}C$  NMR (100 MHz,  $[D_3]$ acetonitrile)  $\delta$  54.2, 59.9, 65.8, 111.6, 119.3, 121.7 (q,  $J_{CF} = 326$  Hz), 148.7, 161.3;  $^{19}F$  NMR (376 Hz,  $[D_3]$ acetonitrile)  $\delta$  -17.2 (6F, s); MS (ESI-TOF)  $m/z$  402  $[M+H]^+$ ; HRMS calcd for  $C_{10}H_{10}F_6NO_5S_2$   $[M+H]^+$ , 401.9905; found, 401.9916; Anal. Calcd for  $C_{10}H_9F_6NO_5S_2$ : C, 29.93; H, 2.26; N, 3.49. Found: C, 30.20; H, 2.41; N, 3.55.

**2-(2-Fluoropyridin-1-ium-1-yl)-1,1-bis((trifluoromethyl)sulfonyl)ethan-1-ide (2g)**

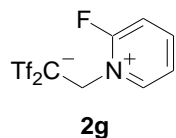

To a solution of  $Tf_2CH_2$  **3** (281 mg, 1.00 mmol) in 1,2-dichloroethane (6.0 mL), paraformaldehyde (90% purity, 73.0 mg, 2.19 mmol) and 2-fluoropyridine (172  $\mu$ L, 2.00 mmol) were added at room temperature. After being stirred for 8 h at 60 °C, the reaction mixture was concentrated under reduced pressure. The resulting residue was washed with  $CHCl_3$  (1.0 mL x 3) to give zwitterion **2g** in 91% yield (356 mg, 0.915 mmol). The structure of this compound was also confirmed by an X-ray crystallographic analysis. Due to its low stability in solution phase, we could not detect suitable peaks in the MS spectra. Colorless crystals ( $CH_3CN$ /hexane); Mp. 151-153 °C; IR (ATR)  $\nu$  1351, 1183, 1106, 861, 776, 579  $cm^{-1}$ ;  $^1H$  NMR (400 MHz,  $[D_3]$ acetonitrile)  $\delta$  5.73 (2H, brs), 7.73-7.78 (1H, dd,  $J_{HH} = 8.4$  Hz,  $J_{HF} = 4.0$  Hz), 7.93 (1H, t,  $J = 6.8$  Hz), 8.57-8.65 (1H, m), 8.92-9.01 (1H, m);  $^{13}C$  NMR (100 MHz,  $[D_3]$ acetonitrile)  $\delta$  60.2, 64.5, 115.1 (d,  $J_{CF} = 21.7$  Hz), 121.5 (q,  $J_{CF} = 326$  Hz), 125.3 (d,  $J_{CF} = 3.7$  Hz), 142.9 (d,  $J_{CF} = 6.1$  Hz), 147.4 (d,  $J_{CF} = 11.5$  Hz), 159.6 (q,  $J_{CF} = 279$  Hz);  $^{19}F$  NMR (376 Hz,  $[D_3]$ acetonitrile)  $\delta$  -17.1 (6F, s), -16.0 (1F, brs). Anal. Calcd for  $C_9H_6F_7NO_4S_2$ : C, 27.77; H, 1.55; N, 3.60. Found: C, 27.49; H, 1.49; N, 3.69.

### 2-(2-Chloropyridin-1-ium-1-yl)-1,1-bis((trifluoromethyl)sulfonyl)ethan-1-ide (2h)

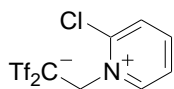

**2h**

To a solution of  $\text{Tf}_2\text{CH}_2$  **3** (282 mg, 1.00 mmol) in 1,2-dichloroethane (6.0 mL), paraformaldehyde (90% purity, 64.5 mg, 2.08 mmol) and 2-chloropyridine (200  $\mu\text{L}$ , 2.13 mmol) were added at room temperature. After being stirred for 5 h at 60  $^\circ\text{C}$ , the reaction mixture was concentrated under reduced pressure. The resulting residue was washed with  $\text{CHCl}_3$  (1.0 mL x 3) to give zwitterion **2h** in 99% yield (403 mg, 0.994 mmol). The structure of this compound was also confirmed by an X-ray crystallographic analysis. Colorless crystals ( $\text{CH}_3\text{CN}/\text{hexane}$ ); Mp. 164-166  $^\circ\text{C}$ ; IR (ATR)  $\nu$  3126, 1370, 1161, 1095, 863, 767, 577  $\text{cm}^{-1}$ ;  $^1\text{H}$  NMR (400 MHz,  $[\text{D}_3]\text{acetonitrile}$ )  $\delta$  5.78 (2H, brs), 8.03-8.08 (1H, m), 8.09 (1H, d,  $J = 7.3$  Hz), 8.46 (1H, td,  $J = 7.3$ , 1.4 Hz), 9.28 (1H, dd,  $J = 6.3$ , 1.4 Hz);  $^{13}\text{C}$  NMR (100 MHz,  $[\text{D}_3]\text{acetonitrile}$ )  $\delta$  63.1, 68.5, 121.6 (q,  $J_{\text{CF}} = 326$  Hz), 127.3 (2C), 130.8, 145.8, 147.9;  $^{19}\text{F}$  NMR (376 Hz,  $[\text{D}_3]\text{acetonitrile}$ )  $\delta$  -17.1 (6F, s); MS (ESI-TOF)  $m/z$  114  $[\text{M}-\text{C}_4\text{H}_2\text{F}_6\text{O}_4\text{S}_2+\text{H}]^+$  116  $[\text{M}+2-\text{C}_4\text{H}_2\text{F}_6\text{O}_4\text{S}_2+\text{H}]^+$ ; Anal. Calcd for  $\text{C}_9\text{H}_6\text{ClF}_6\text{NO}_4\text{S}_2$ : C, 26.64; H, 1.49; N, 3.45. Found: C, 26.68; H, 1.75; N, 3.43.

### 2-(2-Bromopyridin-1-ium-1-yl)-1,1-bis((trifluoromethyl)sulfonyl)ethan-1-ide (2i)

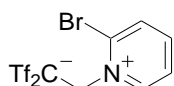

**2i**

To a solution of  $\text{Tf}_2\text{CH}_2$  **3** (280 mg, 0.998 mmol) in 1,2-dichloroethane (6.0 mL), paraformaldehyde (90% purity, 71.4 mg, 2.14 mmol) and 2-bromopyridine (190  $\mu\text{L}$ , 1.99 mmol) were added at room temperature. After being stirred for 4 h at 60  $^\circ\text{C}$ , the reaction mixture was concentrated under reduced pressure. The resulting residue was washed with  $\text{CHCl}_3$  (1.0 mL x 3) to give zwitterion **2i** in 98% yield (440 mg, 0.977 mmol). The structure of this compound was also confirmed by an X-ray crystallographic analysis. Colorless crystals ( $\text{CH}_3\text{CN}/\text{hexane}$ ); Mp. 164-166  $^\circ\text{C}$ ; IR (ATR)  $\nu$  3122, 1368, 1162, 1109, 1092, 864, 776, 576  $\text{cm}^{-1}$ ;  $^1\text{H}$  NMR (400 MHz,  $[\text{D}_3]\text{acetonitrile}$ )  $\delta$  5.77 (2H, brs), 8.07-8.20 (1H, m), 8.26 (1H, dd,  $J = 8.1$ , 1.3 Hz), 8.33 (1H, td,  $J = 8.1$ , 1.3 Hz), 9.36 (1H, dd,  $J = 6.3$ , 1.3 Hz);  $^{13}\text{C}$  NMR (100 MHz,  $[\text{D}_3]\text{acetonitrile}$ )  $\delta$  66.2, 69.2, 121.5 (q,  $J_{\text{CF}} = 326$  Hz), 127.9, 135.0, 138.7, 146.2, 147.2;  $^{19}\text{F}$  NMR (376 Hz,  $[\text{D}_3]\text{acetonitrile}$ )  $\delta$  -17.2 (6F, s); MS (ESI-TOF)  $m/z$  158  $[\text{M}-\text{C}_4\text{H}_2\text{F}_6\text{O}_4\text{S}_2+\text{H}]^+$ , 160  $[\text{M}+2-\text{C}_4\text{H}_2\text{F}_6\text{O}_4\text{S}_2+\text{H}]^+$ ; Anal. Calcd for  $\text{C}_9\text{H}_6\text{BrF}_6\text{NO}_4\text{S}_2$ : C, 23.01; H, 1.34; N, 3.11. Found: C, 23.39; H, 1.59; N, 3.25.

### 2-(Quinolin-1-ium-1-yl)-1,1-bis((trifluoromethyl)sulfonyl)ethan-1-ide (2j)

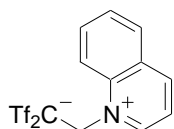

**2j**

To a solution of  $\text{Tf}_2\text{CH}_2$  **3** (282 mg, 1.00 mmol) in 1,2-dichloroethane (6.0 mL), paraformaldehyde (90% purity, 64.6 mg, 2.09 mmol) and quinoline (230  $\mu\text{L}$ , 1.95 mmol) were added at room temperature. After being stirred

for 7 h at 60 °C, the reaction mixture was concentrated under reduced pressure. The resulting residue was washed with CHCl<sub>3</sub> (1.0 mL x 3) to give zwitterion **2j** in 99% yield (418 mg, 0.993 mmol). The structure of this compound was also confirmed by an X-ray crystallographic analysis. Colorless crystals (CH<sub>3</sub>CN/hexane); Mp. 195-198 °C; IR (ATR)  $\nu$  1353, 1185, 1174, 1111, 772, 578 cm<sup>-1</sup>; <sup>1</sup>H NMR (400 MHz, [D<sub>3</sub>]acetonitrile)  $\delta$  5.96 (2H, brs), 8.00-8.07 (1H, m), 8.13 (1H, dd, *J* = 8.3, 5.8 Hz), 8.25-8.31 (1H, m), 8.40 (1H, d, *J* = 8.2 Hz), 8.82 (1H, d, *J* = 9.1 Hz), 9.12 (1H, d, *J* = 8.3 Hz), 9.62 (1H, d, *J* = 5.8 Hz); <sup>13</sup>C NMR (100 MHz, [D<sub>3</sub>]acetonitrile)  $\delta$  58.3, 66.2, 119.4, 121.6 (q, *J*<sub>CF</sub> = 326 Hz), 122.3, 130.85, 130.91, 131.6, 136.5, 139.3, 147.9, 148.9; <sup>19</sup>F NMR (376 Hz, [D<sub>3</sub>]acetonitrile)  $\delta$  -17.3 (6F, s); MS (ESI-TOF) *m/z* 444 [M+Na]<sup>+</sup>, 130 [M-C<sub>4</sub>H<sub>2</sub>F<sub>6</sub>O<sub>4</sub>S<sub>2</sub>+H]<sup>+</sup>; HRMS calcd for C<sub>13</sub>H<sub>9</sub>F<sub>6</sub>NNaO<sub>4</sub>S<sub>2</sub> [M+H]<sup>+</sup>, 443.9775; found, 443.9787; Anal. Calcd for C<sub>13</sub>H<sub>9</sub>F<sub>6</sub>NO<sub>4</sub>S<sub>2</sub>: C, 37.06; H, 2.15; N, 3.32. Found: C, 37.06; H, 2.31; N, 3.37.

### 2-(2-Oxazol-3-ium-3-yl)-1,1-bis((trifluoromethyl)sulfonyl)ethan-1-ide (**2k**)

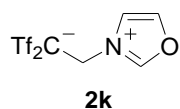

To a solution of Tf<sub>2</sub>CH<sub>2</sub> **3** (282 mg, 1.00 mmol) in 1,2-dichloroethane (6.0 mL), paraformaldehyde (90% purity, 70.1 mg, 2.10 mmol) and oxazole (130  $\mu$ L, 1.96 mmol) were added at room temperature. After being stirred for 4 h at 60 °C, the reaction mixture was concentrated under reduced pressure. The resulting residue was washed with CHCl<sub>3</sub> to give zwitterion **2k** (1.0 mL x 3) in 99% yield (358 mg, 0.991 mmol). The structure of this compound was also confirmed by an X-ray crystallographic analysis. Due to its low stability in solution phase, we could not detect suitable peaks in the MS spectra. Colorless crystals (CH<sub>3</sub>CN/hexane); Mp. 146-148 °C; IR (ATR)  $\nu$  3201, 1354, 1168, 1093, 1034, 896, 573 cm<sup>-1</sup>; <sup>1</sup>H NMR (400 MHz, [D<sub>3</sub>]acetonitrile)  $\delta$  5.32 (2H, br), 8.00 (1H, s), 8.32 (1H, s), 9.53 (1H, s); <sup>13</sup>C NMR (100 MHz, [D<sub>3</sub>]acetonitrile)  $\delta$  51.2, 66.6, 121.6 (q, *J*<sub>CF</sub> = 325 Hz), 122.3, 145.3, 154.5; <sup>19</sup>F NMR (376 Hz, [D<sub>3</sub>]acetonitrile)  $\delta$  -17.6 (6F, s). Anal. Calcd for C<sub>7</sub>H<sub>5</sub>F<sub>6</sub>NO<sub>5</sub>S<sub>2</sub>: C, 23.27; H, 1.40; N, 3.88. Found: C, 23.33; H, 1.63; N, 3.87.

### 2-(1-Methyl-1H-imidazol-3-ium-3-yl)-1,1-bis((trifluoromethyl)sulfonyl)ethan-1-ide (**2m**)

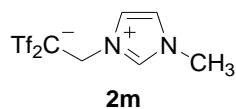

To a solution of Tf<sub>2</sub>CH<sub>2</sub> **3** (281 mg, 1.00 mmol) in 1,2-dichloroethane (6.0 mL), paraformaldehyde (90% purity, 70.4 mg, 2.11 mmol) and 1-methyl-1H-imidazole (160  $\mu$ L, 2.01 mmol) were added at room temperature. After being stirred for 6 h at 60 °C, the reaction mixture was concentrated under reduced pressure. The resulting residue was washed with CHCl<sub>3</sub> (1.0 mL x 3) to give zwitterion **2m** in 99% yield (371 mg, 0.991 mmol). The structure of this compound was also confirmed by an X-ray crystallographic analysis. Colorless crystals (CH<sub>3</sub>CN/hexane); Mp. 193-194 °C; IR (ATR)  $\nu$  3160, 1363, 1176, 1149, 1062, 851, 772, 749, 594 cm<sup>-1</sup>; <sup>1</sup>H NMR (400 MHz, [D<sub>3</sub>]acetonitrile)  $\delta$  3.87 (3H, s), 5.12 (2H, brs), 7.35 (1H, t, *J* = 1.6 Hz), 7.55 (1H, t, *J* = 1.6 Hz), 8.59 (1H, brs); <sup>13</sup>C NMR (100 MHz, [D<sub>3</sub>]acetonitrile)  $\delta$  36.8, 50.2, 67.7, 121.8 (q, *J*<sub>CF</sub> = 326 Hz), 122.9, 124.3, 136.4; <sup>19</sup>F NMR (376 Hz, [D<sub>3</sub>]acetonitrile)  $\delta$  -17.7 (6F, s); MS (ESI-TOF) *m/z* 397 [M+Na]<sup>+</sup>;

HRMS calcd for  $C_8H_8F_6N_2NaO_4S_2$   $[M+Na]^+$ , 396.9727; found, 396.9727; Anal. Calcd for  $C_8H_8F_6N_2O_4S_2$ : C, 25.67; H, 2.15; N, 7.48. Found: C, 25.67; H, 2.36; N, 7.44.

### 2-(1-Butyl-1*H*-imidazol-3-ium-3-yl)-1,1-bis((trifluoromethyl)sulfonyl)ethan-1-ide (**2n**)

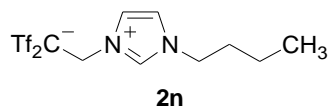

To a solution of  $Tf_2CH_2$  **3** (282 mg, 1.00 mmol) in 1,2-dichloroethane (6.0 mL), paraformaldehyde (90% purity, 70.0 mg, 2.10 mmol) and 1-butyl-1*H*-imidazole (263  $\mu$ L, 2.00 mmol) were added at room temperature. After being stirred for 4 h at 60 °C, the reaction mixture was concentrated under reduced pressure. The resulting residue was washed with  $CHCl_3$  (1.0 mL x 3) to give zwitterion **2n** in 98% yield (410 mg, 0.986 mmol). The structure of this compound was also confirmed by an X-ray crystallographic analysis. Colorless crystals ( $CH_3CN$ /hexane); Mp. 142-143 °C; IR (ATR)  $\nu$  3142, 3088, 1169, 1058, 854, 769, 599  $cm^{-1}$ ;  $^1H$  NMR (400 MHz,  $[D_3]$ acetonitrile)  $\delta$  0.99 (3H, t,  $J$  = 7.4 Hz), 1.35 (2H, sex,  $J$  = 7.4 Hz), 1.79-1.89 (2H, m), 4.19 (2H, t,  $J$  = 7.2 Hz), 5.12 (2H, brs), 7.39-7.43 (1H, m), 7.55-7.59 (1H, m), 8.62 (1H, s);  $^{13}C$  NMR (100 MHz,  $[D_3]$ acetonitrile)  $\delta$  13.4, 19.7, 32.5, 50.2, 67.7, 121.8 (q,  $J_{CF}$  = 326 Hz), 123.0, 123.1, 135.8;  $^{19}F$  NMR (376 Hz,  $[D_3]$ acetonitrile)  $\delta$  -17.7 (6F, s); MS (ESI-TOF)  $m/z$  417  $[M+H]^+$ ; HRMS calcd for  $C_{11}H_{15}F_6N_2O_4S_2$   $[M+H]^+$ , 417.0377; found, 417.0382; Anal. Calcd for  $C_{11}H_{14}F_6N_2O_4S_2$ : C, 31.73; H, 3.39; N, 6.73. Found: C, 32.01; H, 3.53; N, 6.65.

### 3. Bis(triflyl)ethylation reaction

#### 2-(2,2-Bis(trifluoromethylsulfonyl)ethyl)-4-methylphenol (**5**)

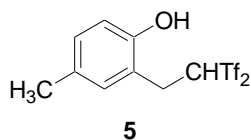

To a solution of *p*-cresole (21.0  $\mu$ L, 0.20 mmol) in  $CH_3CN$  (0.5 mL), zwitterion **2** (0.10 mmol) was added at room temperature. After being stirred at the same temperature for 4 h, the reaction mixture was evaporated. This residue was dissolved in hydrochloric acid (7.0 mL), then it was extracted with  $Et_2O$  (15 mL x 3). After concentration of the combined organic layer, the resultant mixture was purified by bulb-to-bulb distillation (195-210 °C, 5 mmHg) using a kugelrohr oven to give carbon acid **5**. Yields are summarized in Table S1. The structure was confirmed by comparison of  $^1H$  and  $^{13}C$  NMR data reported in the literature.<sup>2</sup> Colorless oil;  $^1H$  NMR (400 MHz,  $CDCl_3$ )  $\delta$  2.27 (3H, s), 3.73 (2H, d,  $J$  = 6.8 Hz), 5.36-5.52 (1H, br, OH), 5.91-5.97 (1H, m), 6.66 (1H, m), 7.03 (1H, d,  $J$  = 8.1 Hz), 7.05 (1H, s);  $^{13}C$  NMR (100 MHz,  $CDCl_3$ )  $\delta$  20.3, 28.0, 76.0, 115.0, 117.6, 119.2 (q,  $J_{C-F}$  = 330.0 Hz), 130.5, 130.9, 133.0, 151.2;  $^{19}F$  NMR (282 Hz,  $CDCl_3$ )  $\delta$  -10.6 (6F, s). Anal. Calcd for  $C_{11}H_{10}F_6O_5S_2$ : C, 33.00; H, 2.52. Found: C, 32.90; H, 2.71.

**Table S1.** Bis(trifluoromethanesulfonyl)ethylation reaction of *p*-cresol using zwitterions

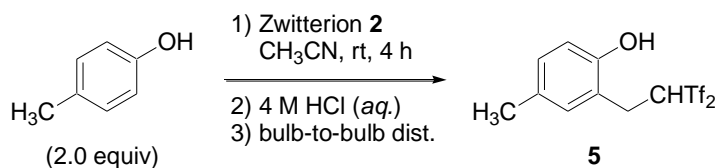

| Entry | <b>2</b>                        | pK <sub>aH</sub> <sup>a</sup> | Yield <sup>b</sup> (%) |
|-------|---------------------------------|-------------------------------|------------------------|
| 1     | <b>2a</b> (pyridinium)          | 5.17                          | 8 (<5)                 |
| 2     | <b>2b</b> (2-methylpyridinium)  | 5.00                          | 0                      |
| 3     | <b>2g</b> (2-fluoropyridinium)  | -0.44                         | 92 (91)                |
| 4     | <b>2h</b> (2-chloropyridinium)  | 0.72                          | 84 (81)                |
| 5     | <b>2j</b> (quinolinium)         | 4.85                          | 32                     |
| 6     | <b>2k</b> (oxazolium)           | 0.80                          | 76 (74)                |
| 7     | <b>2m</b> (3-methylimidazolium) | 7.40                          | 14                     |

<sup>a</sup> A. R. Katritzky, C. A. Ramsden, J. A. Joule, V. V. Zhdankin, Reactivity of Six-membered Rings, in: *Handbook of Heterocyclic Chemistry (3rd Ed.)*, Elsevier, **2010**, pp. 242-382; (b) R. Linnell, *J. Org. Chem.* **1960**, 25, 290.

<sup>b</sup> Yield on the basis of <sup>19</sup>F NMR of crude mixture. Isolated yield is shown in parenthesis.

#### 4. Computational methods

All theoretical calculations were carried out by using the GAMESS 11 program.<sup>3</sup> Restricted Hartree-Fock (RHF) wave functions were calculated by this program. 6-311++G(2d,p) basis sets were used. Geometries were fully optimized at the RHF/6-311++G(2d,p) levels of theory. The orbital interaction energies were calculated by using the natural bond orbital (NBO) method<sup>4</sup> at the RHF/6-311++G(2d,p) level.

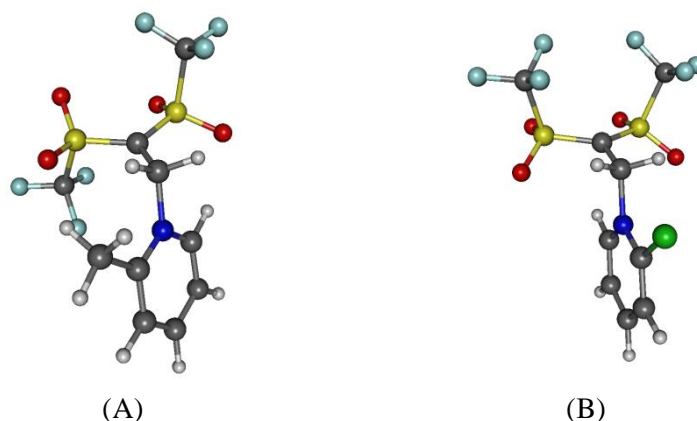

RHF/6-311++G(2d,p) optimized structures. (A) *anti*-**2b**, C<sup>-</sup>-C = 148.9 pm, C-N<sup>+</sup> = 152.2 pm. (B) *syn*-**2h**, C<sup>-</sup>-C = 147.6 pm, C-N<sup>+</sup> = 155.3 pm.

## 5. X-ray crystallographic data

Crystallographic data for the X-ray crystal structure analysis of **2a-2n** have been deposited with Cambridge Crystallographic Data Center (CCDC) as supplementary publication Nos. CCDC 948820 (**2a**), 948821 (**2b**), 948822 (**2c**), 948823 (**2d**), 948824 (**2e**), 948825 (**2f**), 948826 (**2g**), 948827 (**2h**), 948828 (**2i**), 948829 (**2j**), 948830 (**2k**), 948831 (**2m**), and 948832 (**2n**). These data can be obtained free of charge from the CCDC *via* [www.ccdc.cam.ac.uk/data\\_request/cif](http://www.ccdc.cam.ac.uk/data_request/cif).

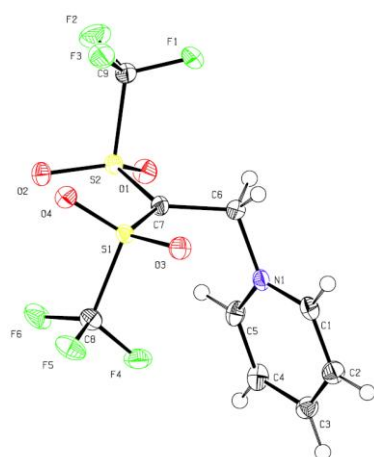

X-ray structure of **2a**

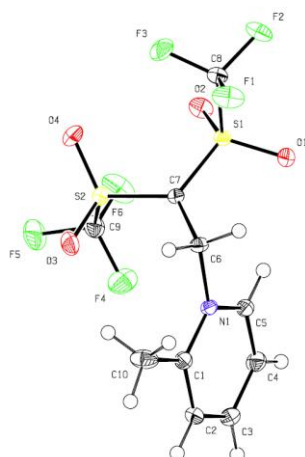

X-ray structure of **2b**

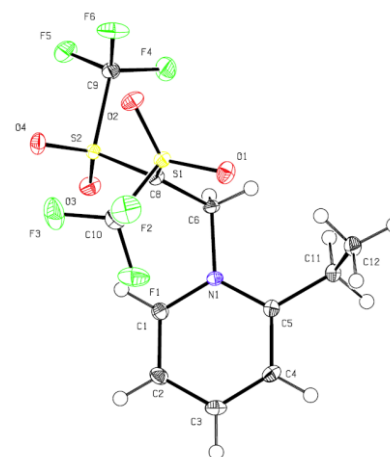

X-ray structure of **2c**

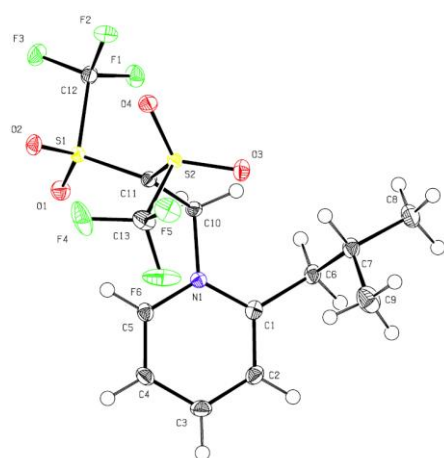

X-ray structure of **2d**

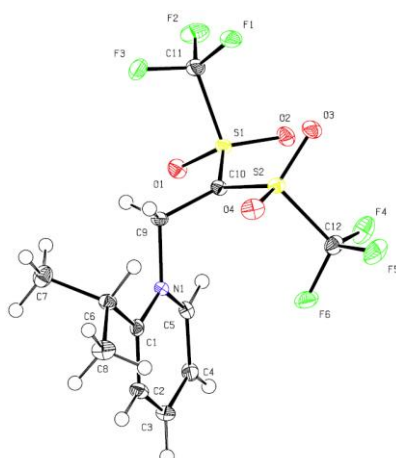

X-ray structure of **2e**

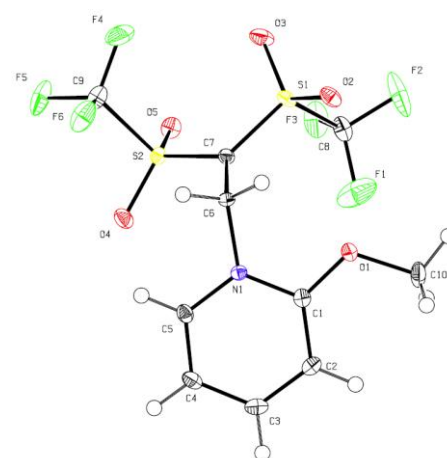

X-ray structure of **2f**

**Table S2.** Crystal data and structure refinement for **2a**.

|                      |                    |                       |
|----------------------|--------------------|-----------------------|
| Empirical formula    | $C_9H_7F_6NO_4S_2$ |                       |
| Formula weight       | 371.28             |                       |
| Temperature          | 90 K               |                       |
| Wavelength           | 0.71073 Å          |                       |
| Crystal system       | Monoclinic         |                       |
| Space group          | P 21/n             |                       |
| Unit cell dimensions | $a = 14.8808(6)$ Å | $\alpha = 90^\circ$ . |

|                                        |                                                                   |                             |
|----------------------------------------|-------------------------------------------------------------------|-----------------------------|
|                                        | $b = 10.4392(5) \text{ \AA}$                                      | $\beta = 91.5270(10)^\circ$ |
|                                        | $c = 42.5523(18) \text{ \AA}$                                     | $\gamma = 90^\circ$         |
| Volume                                 | $6607.9(5) \text{ \AA}^3$                                         |                             |
| Z                                      | 20                                                                |                             |
| Density (calculated)                   | $1.866 \text{ g/cm}^3$                                            |                             |
| Absorption coefficient                 | $0.493 \text{ mm}^{-1}$                                           |                             |
| F(000)                                 | 3720                                                              |                             |
| Crystal size                           | $0.24 \times 0.15 \times 0.12 \text{ mm}^3$                       |                             |
| Theta range for data collection        | $2.17$ to $25.03^\circ$                                           |                             |
| Index ranges                           | $-17 \leq h \leq 13$ , $-7 \leq k \leq 12$ , $-42 \leq l \leq 50$ |                             |
| Reflections collected                  | 30937                                                             |                             |
| Independent reflections                | 11691 [R(int) = 0.0249]                                           |                             |
| Completeness to $\theta = 25.03^\circ$ | 99.9 %                                                            |                             |
| Absorption correction                  | Analytical                                                        |                             |
| Max. and min. transmission             | 0.9432 and 0.8907                                                 |                             |
| Refinement method                      | Full-matrix least-squares on $F^2$                                |                             |
| Data / restraints / parameters         | 11691 / 0 / 991                                                   |                             |
| Goodness-of-fit on $F^2$               | 1.058                                                             |                             |
| Final R indices [ $I > 2\sigma(I)$ ]   | $R1 = 0.0307$ , $wR2 = 0.0733$                                    |                             |
| R indices (all data)                   | $R1 = 0.0368$ , $wR2 = 0.0767$                                    |                             |
| Largest diff. peak and hole            | $0.417$ and $-0.421 \text{ e\AA}^{-3}$                            |                             |

**Table S3.** Crystal data and structure refinement for **2b**.

|                        |                                                          |                              |
|------------------------|----------------------------------------------------------|------------------------------|
| Empirical formula      | $\text{C}_{10}\text{H}_9\text{F}_6\text{NO}_4\text{S}_2$ |                              |
| Formula weight         | 385.30                                                   |                              |
| Temperature            | 90 K                                                     |                              |
| Wavelength             | $0.71073 \text{ \AA}$                                    |                              |
| Crystal system         | Monoclinic                                               |                              |
| Space group            | P 21/c                                                   |                              |
| Unit cell dimensions   | $a = 12.9290(14) \text{ \AA}$                            | $\alpha = 90^\circ$          |
|                        | $b = 10.0352(11) \text{ \AA}$                            | $\beta = 115.3760(10)^\circ$ |
|                        | $c = 12.0294(13) \text{ \AA}$                            | $\gamma = 90^\circ$          |
| Volume                 | $1410.2(3) \text{ \AA}^3$                                |                              |
| Z                      | 4                                                        |                              |
| Density (calculated)   | $1.815 \text{ g/cm}^3$                                   |                              |
| Absorption coefficient | $0.466 \text{ mm}^{-1}$                                  |                              |
| F(000)                 | 776                                                      |                              |
| Crystal size           | $0.20 \times 0.09 \times 0.09 \text{ mm}^3$              |                              |

|                                   |                                             |
|-----------------------------------|---------------------------------------------|
| Theta range for data collection   | 2.68 to 25.03°.                             |
| Index ranges                      | -15<=h<=14, -11<=k<=11, -10<=l<=14          |
| Reflections collected             | 6577                                        |
| Independent reflections           | 2484 [R(int) = 0.0215]                      |
| Completeness to theta = 25.03°    | 99.8 %                                      |
| Absorption correction             | Analytical                                  |
| Max. and min. transmission        | 0.9593 and 0.9125                           |
| Refinement method                 | Full-matrix least-squares on F <sup>2</sup> |
| Data / restraints / parameters    | 2484 / 0 / 209                              |
| Goodness-of-fit on F <sup>2</sup> | 1.045                                       |
| Final R indices [I>2sigma(I)]     | R1 = 0.0275, wR2 = 0.0701                   |
| R indices (all data)              | R1 = 0.0312, wR2 = 0.0725                   |
| Largest diff. peak and hole       | 0.401 and -0.358 eÅ <sup>-3</sup>           |

**Table S4.** Crystal data and structure refinement for **2c**.

|                                 |                                                                               |                   |
|---------------------------------|-------------------------------------------------------------------------------|-------------------|
| Empirical formula               | C <sub>11</sub> H <sub>11</sub> F <sub>6</sub> NO <sub>4</sub> S <sub>2</sub> |                   |
| Formula weight                  | 399.33                                                                        |                   |
| Temperature                     | 90 K                                                                          |                   |
| Wavelength                      | 0.71073 Å                                                                     |                   |
| Crystal system                  | Monoclinic                                                                    |                   |
| Space group                     | P 1 21/c 1                                                                    |                   |
| Unit cell dimensions            | a = 12.8277(11) Å                                                             | α = 90°.          |
|                                 | b = 10.1124(8) Å                                                              | β = 91.5270(10)°. |
|                                 | c = 12.5805(10) Å                                                             | γ = 90°.          |
| Volume                          | 1461.8(2) Å <sup>3</sup>                                                      |                   |
| Z                               | 4                                                                             |                   |
| Density (calculated)            | 1.814 g/cm <sup>3</sup>                                                       |                   |
| Absorption coefficient          | 0.453 mm <sup>-1</sup>                                                        |                   |
| F(000)                          | 808                                                                           |                   |
| Crystal size                    | 0.24 x 0.25 x 0.29 mm <sup>3</sup>                                            |                   |
| Theta range for data collection | 2.68 to 27.64°.                                                               |                   |
| Index ranges                    | -16<=h<=16, -13<=k<=13, -16<=l<=9                                             |                   |
| Reflections collected           | 8329                                                                          |                   |
| Independent reflections         | 3381 [R(int) = 0.0150]                                                        |                   |
| Completeness to theta = 25.03°  | 99.4 %                                                                        |                   |
| Absorption correction           | Numerical                                                                     |                   |
| Max. and min. transmission      | 0.8990 and 0.8798                                                             |                   |
| Refinement method               | Full-matrix least-squares on F <sup>2</sup>                                   |                   |

|                                      |                                     |
|--------------------------------------|-------------------------------------|
| Data / restraints / parameters       | 3381 / 0 / 218                      |
| Goodness-of-fit on $F^2$             | 1.037                               |
| Final R indices [ $I > 2\sigma(I)$ ] | $R1 = 0.0260$ , $wR2 = 0.0709$      |
| R indices (all data)                 | $R1 = 0.0278$ , $wR2 = 0.0723$      |
| Largest diff. peak and hole          | 0.526 and -0.344 $e\text{\AA}^{-3}$ |

**Table S5.** Crystal data and structure refinement for **2d**.

|                                     |                                                                   |                             |
|-------------------------------------|-------------------------------------------------------------------|-----------------------------|
| Chemical formula                    | $C_{13}H_{15}F_6NO_4S_2$                                          |                             |
| Formula weight                      | 427.38                                                            |                             |
| Wavelength                          | 0.71073 $\text{\AA}$                                              |                             |
| Crystal size                        | 0.200 x 0.230 x 0.360 mm                                          |                             |
| Crystal system                      | monoclinic                                                        |                             |
| Space group                         | P 1 21/n 1                                                        |                             |
| Unit cell dimensions                | $a = 8.7218(8) \text{\AA}$                                        | $\alpha = 90^\circ$         |
|                                     | $b = 11.6643(11) \text{\AA}$                                      | $\beta = 91.9270(10)^\circ$ |
|                                     | $c = 16.8924(15) \text{\AA}$                                      | $\gamma = 90^\circ$         |
| Volume                              | 1717.6(3) $\text{\AA}^3$                                          |                             |
| Z                                   | 4                                                                 |                             |
| Density (calculated)                | 1.653 $\text{g/cm}^3$                                             |                             |
| Absorption coefficient              | 0.392 $\text{mm}^{-1}$                                            |                             |
| F(000)                              | 872                                                               |                             |
| Theta range for data collection     | 2.12 to 25.03°                                                    |                             |
| Index ranges                        | $-10 \leq h \leq 6$ , $-13 \leq k \leq 12$ , $-20 \leq l \leq 19$ |                             |
| Reflections collected               | 8174                                                              |                             |
| Independent reflections             | 3033 [ $R(\text{int}) = 0.0172$ ]                                 |                             |
| Coverage of independent reflections | 99.8%                                                             |                             |
| Absorption correction               | numerical                                                         |                             |
| Max. and min. transmission          | 0.9258 and 0.8719                                                 |                             |
| Structure solution technique        | direct methods                                                    |                             |
| Structure solution program          | SHELXS-97 (Sheldrick, 1997)                                       |                             |
| Refinement method                   | Full-matrix least-squares on $F^2$                                |                             |
| Refinement program                  | SHELXL-97 (Sheldrick, 1997)                                       |                             |
| Function minimized                  | $\Sigma w(F_o^2 - F_c^2)^2$                                       |                             |
| Data / restraints / parameters      | 3033 / 0 / 238                                                    |                             |

|                             |                                                                                     |                           |
|-----------------------------|-------------------------------------------------------------------------------------|---------------------------|
| Goodness-of-fit on $F^2$    | 1.049                                                                               |                           |
| Final R indices             | 2847 data; $I > 2\sigma(I)$                                                         | R1 = 0.0260, wR2 = 0.0667 |
|                             | all data                                                                            | R1 = 0.0275, wR2 = 0.0678 |
| Weighting scheme            | $w = 1/[\sigma^2(F_o^2) + (0.0320P)^2 + 1.2705P]$<br>where $P = (F_o^2 + 2F_c^2)/3$ |                           |
| Largest diff. peak and hole | 0.333 and -0.384 $e\text{\AA}^{-3}$                                                 |                           |
| R.M.S. deviation from mean  | 0.051 $e\text{\AA}^{-3}$                                                            |                           |

**Table S6.** Crystal data and structure refinement for **2e**.

|                                     |                                                                   |                              |
|-------------------------------------|-------------------------------------------------------------------|------------------------------|
| Chemical formula                    | $C_{12}H_{13}F_6NO_4S_2$                                          |                              |
| Formula weight                      | 413.35                                                            |                              |
| Wavelength                          | 0.71073 $\text{\AA}$                                              |                              |
| Crystal size                        | 0.130 x 0.140 x 0.210 mm                                          |                              |
| Crystal system                      | monoclinic                                                        |                              |
| Space group                         | P 1 21/n 1                                                        |                              |
| Unit cell dimensions                | $a = 8.5646(8) \text{\AA}$                                        | $\alpha = 90^\circ$          |
|                                     | $b = 12.1042(11) \text{\AA}$                                      | $\beta = 101.8640(10)^\circ$ |
|                                     | $c = 16.0084(14) \text{\AA}$                                      | $\gamma = 90^\circ$          |
| Volume                              | 1624.1(3) $\text{\AA}^3$                                          |                              |
| Z                                   | 4                                                                 |                              |
| Density (calculated)                | 1.691 $\text{g/cm}^3$                                             |                              |
| Absorption coefficient              | 0.411 $\text{mm}^{-1}$                                            |                              |
| F(000)                              | 840                                                               |                              |
| Theta range for data collection     | 2.13 to 25.03°                                                    |                              |
| Index ranges                        | $-10 \leq h \leq 5$ , $-14 \leq k \leq 13$ , $-15 \leq l \leq 19$ |                              |
| Reflections collected               | 7745                                                              |                              |
| Independent reflections             | 2865 [ $R(\text{int}) = 0.0219$ ]                                 |                              |
| Coverage of independent reflections | 99.9%                                                             |                              |
| Absorption correction               | numerical                                                         |                              |
| Max. and min. transmission          | 0.9485 and 0.9187                                                 |                              |
| Structure solution technique        | direct methods                                                    |                              |
| Structure solution program          | SHELXS-97 (Sheldrick, 1997)                                       |                              |
| Refinement method                   | Full-matrix least-squares on $F^2$                                |                              |

|                                |                                                   |                           |
|--------------------------------|---------------------------------------------------|---------------------------|
| Refinement program             | SHELXL-97 (Sheldrick, 1997)                       |                           |
| Function minimized             | $\Sigma w(F_o^2 - F_c^2)^2$                       |                           |
| Data / restraints / parameters | 2865 / 0 / 228                                    |                           |
| Goodness-of-fit on $F^2$       | 1.046                                             |                           |
| $\Delta/\sigma_{\max}$         | 0.001                                             |                           |
| Final R indices                | 2610 data; $I > 2\sigma(I)$                       | R1 = 0.0263, wR2 = 0.0673 |
|                                | all data                                          | R1 = 0.0293, wR2 = 0.0698 |
| Weighting scheme               | $w = 1/[\sigma^2(F_o^2) + (0.0341P)^2 + 0.8839P]$ |                           |
|                                | where $P = (F_o^2 + 2F_c^2)/3$                    |                           |
| Largest diff. peak and hole    | 0.350 and -0.377 eÅ <sup>-3</sup>                 |                           |
| R.M.S. deviation from mean     | 0.050 eÅ <sup>-3</sup>                            |                           |

**Table S7.** Crystal data and structure refinement for **2f**.

|                                     |                                                                              |                           |
|-------------------------------------|------------------------------------------------------------------------------|---------------------------|
| Chemical formula                    | C <sub>10</sub> H <sub>9</sub> F <sub>6</sub> NO <sub>5</sub> S <sub>2</sub> |                           |
| Formula weight                      | 401.30                                                                       |                           |
| Wavelength                          | 0.71073 Å                                                                    |                           |
| Crystal size                        | 0.070 x 0.140 x 0.160 mm                                                     |                           |
| Crystal system                      | monoclinic                                                                   |                           |
| Space group                         | P 1 21/n 1                                                                   |                           |
| Unit cell dimensions                | a = 9.6307(12) Å                                                             | $\alpha = 90^\circ$       |
|                                     | b = 10.0920(13) Å                                                            | $\beta = 96.144(2)^\circ$ |
|                                     | c = 14.9590(19) Å                                                            | $\gamma = 90^\circ$       |
| Volume                              | 1445.6(3) Å <sup>3</sup>                                                     |                           |
| Z                                   | 4                                                                            |                           |
| Density (calculated)                | 1.844 g/cm <sup>3</sup>                                                      |                           |
| Absorption coefficient              | 0.464 mm <sup>-1</sup>                                                       |                           |
| F(000)                              | 808                                                                          |                           |
| Theta range for data collection     | 2.40 to 27.55°                                                               |                           |
| Index ranges                        | -12 ≤ h ≤ 12, -13 ≤ k ≤ 10, -16 ≤ l ≤ 19                                     |                           |
| Reflections collected               | 8230                                                                         |                           |
| Independent reflections             | 3323 [R(int) = 0.0229]                                                       |                           |
| Coverage of independent reflections | 99.6%                                                                        |                           |
| Absorption correction               | numerical                                                                    |                           |

|                                |                                                                                          |
|--------------------------------|------------------------------------------------------------------------------------------|
| Max. and min. transmission     | 0.9683 and 0.9295                                                                        |
| Structure solution technique   | direct methods                                                                           |
| Structure solution program     | SHELXS-97 (Sheldrick, 1997)                                                              |
| Refinement method              | Full-matrix least-squares on $F^2$                                                       |
| Refinement program             | SHELXL-97 (Sheldrick, 1997)                                                              |
| Function minimized             | $\Sigma w(F_o^2 - F_c^2)^2$                                                              |
| Data / restraints / parameters | 3323 / 0 / 218                                                                           |
| Goodness-of-fit on $F^2$       | 1.018                                                                                    |
| $\Delta/\sigma_{\max}$         | 0.001                                                                                    |
| Final R indices                | 2900 data; $I > 2\sigma(I)$ <span style="float: right;">R1 = 0.0309, wR2 = 0.0775</span> |
|                                | all data <span style="float: right;">R1 = 0.0371, wR2 = 0.0816</span>                    |
| Weighting scheme               | $w = 1/[\sigma^2(F_o^2) + (0.0404P)^2 + 0.9149P]$<br>where $P = (F_o^2 + 2F_c^2)/3$      |
| Largest diff. peak and hole    | 0.521 and -0.392 $\text{e}\text{\AA}^{-3}$                                               |
| R.M.S. deviation from mean     | 0.062 $\text{e}\text{\AA}^{-3}$                                                          |

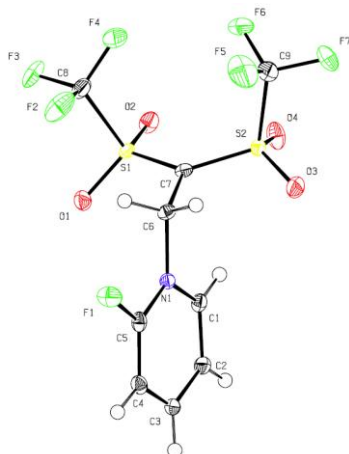

X-ray structure of **2g**

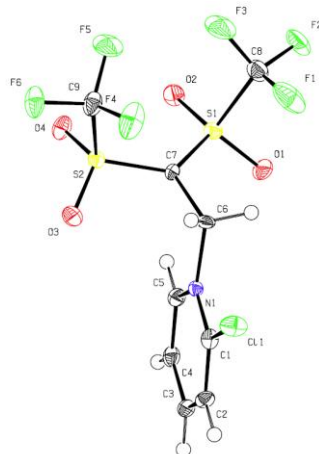

X-ray structure of **2h**

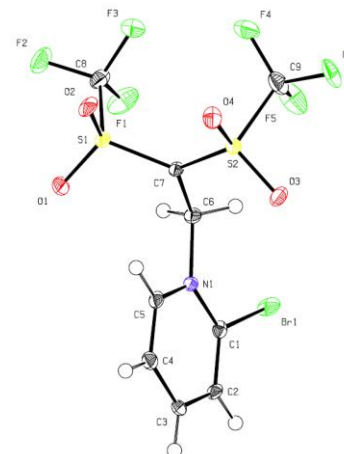

X-ray structure of **2i**

**Table S8.** Crystal data and structure refinement for **2g**.

|                  |                                                       |
|------------------|-------------------------------------------------------|
| Chemical formula | $\text{C}_9\text{H}_6\text{F}_7\text{NO}_4\text{S}_2$ |
| Formula weight   | 389.27                                                |
| Wavelength       | 0.71073 $\text{\AA}$                                  |
| Crystal size     | 0.060 x 0.160 x 0.220 mm                              |
| Crystal system   | monoclinic                                            |
| Space group      | $P 1 21/n 1$                                          |

|                                     |                                                                                     |                                |
|-------------------------------------|-------------------------------------------------------------------------------------|--------------------------------|
| Unit cell dimensions                | $a = 9.6880(10) \text{ \AA}$                                                        | $\alpha = 90^\circ$            |
|                                     | $b = 21.565(2) \text{ \AA}$                                                         | $\beta = 101.4530(10)^\circ$   |
|                                     | $c = 13.5597(13) \text{ \AA}$                                                       | $\gamma = 90^\circ$            |
| Volume                              | $2776.5(5) \text{ \AA}^3$                                                           |                                |
| Z                                   | 8                                                                                   |                                |
| Density (calculated)                | $1.862 \text{ g/cm}^3$                                                              |                                |
| Absorption coefficient              | $0.484 \text{ mm}^{-1}$                                                             |                                |
| F(000)                              | 1552                                                                                |                                |
| Theta range for data collection     | 2.34 to $25.02^\circ$                                                               |                                |
| Index ranges                        | $-9 \leq h \leq 11$ , $-25 \leq k \leq 20$ , $-15 \leq l \leq 16$                   |                                |
| Reflections collected               | 13387                                                                               |                                |
| Independent reflections             | 4901 [ $R(\text{int}) = 0.0244$ ]                                                   |                                |
| Coverage of independent reflections | 99.9%                                                                               |                                |
| Absorption correction               | numerical                                                                           |                                |
| Max. and min. transmission          | 0.9697 and 0.9030                                                                   |                                |
| Structure solution technique        | direct methods                                                                      |                                |
| Structure solution program          | SHELXS-97 (Sheldrick, 1997)                                                         |                                |
| Refinement method                   | Full-matrix least-squares on $F^2$                                                  |                                |
| Refinement program                  | SHELXL-97 (Sheldrick, 1997)                                                         |                                |
| Function minimized                  | $\Sigma w(F_o^2 - F_c^2)^2$                                                         |                                |
| Data / restraints / parameters      | 4901 / 0 / 415                                                                      |                                |
| Goodness-of-fit on $F^2$            | 1.051                                                                               |                                |
| Final R indices                     | 4075 data; $I > 2\sigma(I)$                                                         | $R1 = 0.0375$ , $wR2 = 0.1003$ |
|                                     | all data                                                                            | $R1 = 0.0456$ , $wR2 = 0.1067$ |
|                                     | $w = 1/[\sigma^2(F_o^2) + (0.0585P)^2 + 2.0617P]$<br>where $P = (F_o^2 + 2F_c^2)/3$ |                                |
| Weighting scheme                    |                                                                                     |                                |
| Largest diff. peak and hole         | $0.939$ and $-0.383 \text{ e\AA}^{-3}$                                              |                                |
| R.M.S. deviation from mean          | $0.072 \text{ e\AA}^{-3}$                                                           |                                |

**Table S9.** Crystal data and structure refinement for **2h**.

|                   |                                                         |
|-------------------|---------------------------------------------------------|
| Empirical formula | $\text{C}_9\text{H}_6\text{ClF}_6\text{NO}_4\text{S}_2$ |
| Formula weight    | 405.72                                                  |
| Temperature       | 90 K                                                    |
| Wavelength        | $0.71073 \text{ \AA}$                                   |

|                                        |                                                                    |
|----------------------------------------|--------------------------------------------------------------------|
| Crystal system                         | Monoclinic                                                         |
| Space group                            | C 2/c                                                              |
| Unit cell dimensions                   | $a = 9.8403(17) \text{ \AA}$ $\alpha = 90^\circ$ .                 |
|                                        | $b = 21.718(4) \text{ \AA}$ $\beta = 103.359(2)^\circ$ .           |
|                                        | $c = 13.666(2) \text{ \AA}$ $\gamma = 90^\circ$ .                  |
| Volume                                 | $2841.4(9) \text{ \AA}^3$                                          |
| Z                                      | 8                                                                  |
| Density (calculated)                   | $1.897 \text{ g/cm}^3$                                             |
| Absorption coefficient                 | $0.650 \text{ mm}^{-1}$                                            |
| F(000)                                 | 1616                                                               |
| Crystal size                           | $0.50 \times 0.40 \times 0.25 \text{ mm}^3$                        |
| Theta range for data collection        | $2.32$ to $25.03^\circ$ .                                          |
| Index ranges                           | $-11 \leq h \leq 11$ , $-25 \leq k \leq 17$ , $-16 \leq l \leq 15$ |
| Reflections collected                  | 6772                                                               |
| Independent reflections                | 2510 [R(int) = 0.0467]                                             |
| Completeness to $\theta = 25.03^\circ$ | 99.7 %                                                             |
| Absorption correction                  | Empirical                                                          |
| Max. and min. transmission             | 0.8544 and 0.7371                                                  |
| Refinement method                      | Full-matrix least-squares on $F^2$                                 |
| Data / restraints / parameters         | 2510 / 0 / 208                                                     |
| Goodness-of-fit on $F^2$               | 1.009                                                              |
| Final R indices [ $I > 2\sigma(I)$ ]   | $R1 = 0.0374$ , $wR2 = 0.0733$                                     |
| R indices (all data)                   | $R1 = 0.0617$ , $wR2 = 0.0807$                                     |
| Largest diff. peak and hole            | $0.367$ and $-0.346 \text{ e.\AA}^{-3}$                            |

**Table S10.** Crystal data and structure refinement for **2i**.

|                      |                                                         |
|----------------------|---------------------------------------------------------|
| Chemical formula     | $\text{C}_9\text{H}_6\text{BrF}_6\text{NO}_4\text{S}_2$ |
| Formula weight       | 450.18                                                  |
| Wavelength           | $0.71073 \text{ \AA}$                                   |
| Crystal size         | $0.060 \times 0.210 \times 0.230 \text{ mm}$            |
| Crystal system       | monoclinic                                              |
| Space group          | C 1 2/c 1                                               |
| Unit cell dimensions | $a = 9.926(2) \text{ \AA}$ $\alpha = 90^\circ$          |
|                      | $b = 21.888(5) \text{ \AA}$ $\beta = 103.046(3)^\circ$  |
|                      | $c = 13.659(3) \text{ \AA}$ $\gamma = 90^\circ$         |
| Volume               | $2891.0(12) \text{ \AA}^3$                              |
| Z                    | 8                                                       |

|                                     |                                                                                                                         |                           |
|-------------------------------------|-------------------------------------------------------------------------------------------------------------------------|---------------------------|
| Density (calculated)                | 2.069 g/cm <sup>3</sup>                                                                                                 |                           |
| Absorption coefficient              | 3.218 mm <sup>-1</sup>                                                                                                  |                           |
| F(000)                              | 1760                                                                                                                    |                           |
| Theta range for data collection     | 2.30 to 25.02°                                                                                                          |                           |
| Index ranges                        | -11<=h<=9, -19<=k<=26, -16<=l<=15                                                                                       |                           |
| Reflections collected               | 6803                                                                                                                    |                           |
| Independent reflections             | 2551 [R(int) = 0.1148]                                                                                                  |                           |
| Coverage of independent reflections | 99.6%                                                                                                                   |                           |
| Max. and min. transmission          | 0.8304 and 0.5248                                                                                                       |                           |
| Structure solution technique        | direct methods                                                                                                          |                           |
| Structure solution program          | SHELXS-97 (Sheldrick, 1997)                                                                                             |                           |
| Refinement method                   | Full-matrix least-squares on F <sup>2</sup>                                                                             |                           |
| Refinement program                  | SHELXL-97 (Sheldrick, 1997)                                                                                             |                           |
| Function minimized                  | $\Sigma w(F_o^2 - F_c^2)^2$                                                                                             |                           |
| Data / restraints / parameters      | 2551 / 120 / 208                                                                                                        |                           |
| Goodness-of-fit on F <sup>2</sup>   | 0.987                                                                                                                   |                           |
| $\Delta/\sigma_{\max}$              | 0.002                                                                                                                   |                           |
| Final R indices                     | 2227 data; I>2 $\sigma$ (I)                                                                                             | R1 = 0.0331, wR2 = 0.0687 |
|                                     | all data                                                                                                                | R1 = 0.0373, wR2 = 0.0702 |
| Weighting scheme                    | w=1/[ $\sigma^2(F_o^2)+(0.0303P)^2+0.0000P$ ]<br>where P=(F <sub>o</sub> <sup>2</sup> +2F <sub>c</sub> <sup>2</sup> )/3 |                           |
| Largest diff. peak and hole         | 0.999 and -0.591 eÅ <sup>-3</sup>                                                                                       |                           |
| R.M.S. deviation from mean          | 0.112 eÅ <sup>-3</sup>                                                                                                  |                           |

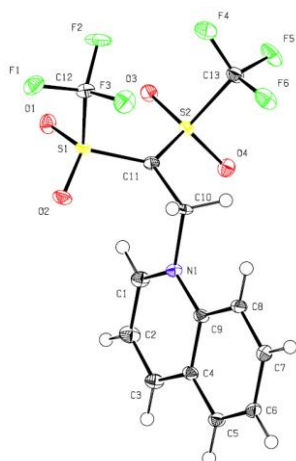

X-ray structure of **2j**

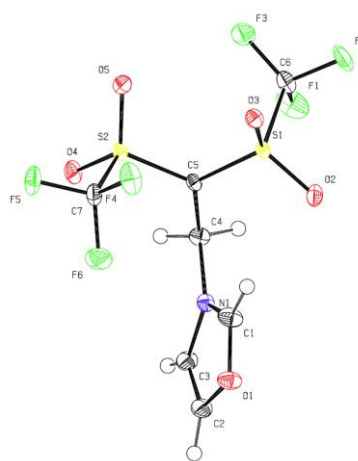

X-ray structure of **2k**

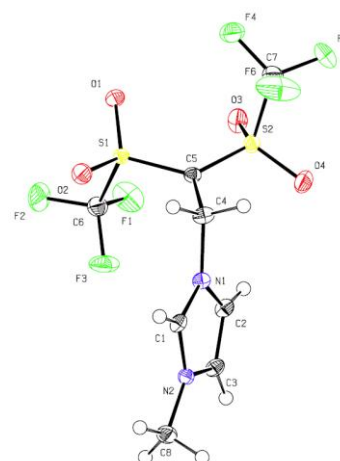

X-ray structure of **2m**

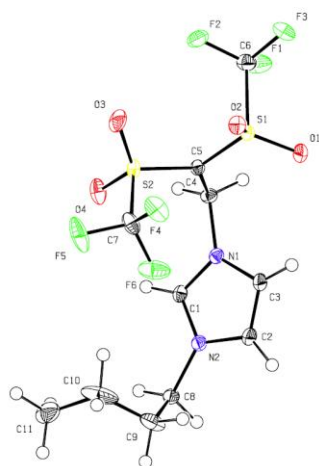

X-ray structure of **2n**

**Table S11.** Crystal data and structure refinement for **2j**.

|                                     |                                                          |                              |
|-------------------------------------|----------------------------------------------------------|------------------------------|
| Chemical formula                    | $\text{C}_{13}\text{H}_9\text{F}_6\text{NO}_4\text{S}_2$ |                              |
| Formula weight                      | 421.33                                                   |                              |
| Wavelength                          | 0.71073 Å                                                |                              |
| Crystal size                        | 0.210 x 0.260 x 0.360 mm                                 |                              |
| Crystal system                      | monoclinic                                               |                              |
| Space group                         | C 1 2/c 1                                                |                              |
| Unit cell dimensions                | $a = 18.3052(16)$ Å                                      | $\alpha = 90^\circ$          |
|                                     | $b = 11.2926(10)$ Å                                      | $\beta = 106.7430(10)^\circ$ |
|                                     | $c = 15.9199(14)$ Å                                      | $\gamma = 90^\circ$          |
| Volume                              | $3151.3(5)$ Å <sup>3</sup>                               |                              |
| Z                                   | 8                                                        |                              |
| Density (calculated)                | $1.776 \text{ g/cm}^3$                                   |                              |
| Absorption coefficient              | $0.426 \text{ mm}^{-1}$                                  |                              |
| F(000)                              | 1696                                                     |                              |
| Theta range for data collection     | 2.15 to $25.03^\circ$                                    |                              |
| Reflections collected               | 2771                                                     |                              |
| Coverage of independent reflections | 99.5%                                                    |                              |
| Max. and min. transmission          | 0.9159 and 0.8618                                        |                              |
| Structure solution technique        | direct methods                                           |                              |
| Structure solution program          | SHELXS-97 (Sheldrick, 1997)                              |                              |
| Refinement method                   | Full-matrix least-squares on $F^2$                       |                              |
| Refinement program                  | SHELXL-97 (Sheldrick, 1997)                              |                              |

|                                |                                                                                     |                           |
|--------------------------------|-------------------------------------------------------------------------------------|---------------------------|
| Function minimized             | $\Sigma w(F_o^2 - F_c^2)^2$                                                         |                           |
| Data / restraints / parameters | 2771 / 0 / 236                                                                      |                           |
| Goodness-of-fit on $F^2$       | 1.053                                                                               |                           |
| Final R indices                | 2615 data; $I > 2\sigma(I)$                                                         | R1 = 0.0527, wR2 = 0.1493 |
|                                | all data                                                                            | R1 = 0.0539, wR2 = 0.1508 |
| Weighting scheme               | $w = 1/[\sigma^2(F_o^2) + (0.1190P)^2 + 3.8675P]$<br>where $P = (F_o^2 + 2F_c^2)/3$ |                           |
| Largest diff. peak and hole    | 0.594 and -0.837 $e\text{\AA}^{-3}$                                                 |                           |
| R.M.S. deviation from mean     | 0.130 $e\text{\AA}^{-3}$                                                            |                           |

**Table S12.** Crystal data and structure refinement for **2k**.

|                                     |                                                                    |                              |
|-------------------------------------|--------------------------------------------------------------------|------------------------------|
| Chemical formula                    | $C_7H_5F_6NO_5S_2$                                                 |                              |
| Formula weight                      | 361.24                                                             |                              |
| Wavelength                          | 0.71073 $\text{\AA}$                                               |                              |
| Crystal size                        | 0.120 x 0.120 x 0.200 mm                                           |                              |
| Crystal system                      | monoclinic                                                         |                              |
| Space group                         | C 1 2/c 1                                                          |                              |
| Unit cell dimensions                | $a = 33.764(3) \text{\AA}$                                         | $\alpha = 90^\circ$          |
|                                     | $b = 8.8317(7) \text{\AA}$                                         | $\beta = 126.4270(10)^\circ$ |
|                                     | $c = 20.2876(15) \text{\AA}$                                       | $\gamma = 90^\circ$          |
| Volume                              | 4867.6(6) $\text{\AA}^3$                                           |                              |
| Z                                   | 16                                                                 |                              |
| Density (calculated)                | 1.972 $\text{g/cm}^3$                                              |                              |
| Absorption coefficient              | 0.539 $\text{mm}^{-1}$                                             |                              |
| F(000)                              | 2880                                                               |                              |
| Theta range for data collection     | 2.42 to 25.03°                                                     |                              |
| Index ranges                        | $-40 \leq h \leq 37$ , $-10 \leq k \leq 10$ , $-24 \leq l \leq 22$ |                              |
| Reflections collected               | 11425                                                              |                              |
| Independent reflections             | 4293 [R(int) = 0.0206]                                             |                              |
| Coverage of independent reflections | 99.8%                                                              |                              |
| Absorption correction               | numerical                                                          |                              |
| Max. and min. transmission          | 0.9382 and 0.8999                                                  |                              |
| Structure solution technique        | direct methods                                                     |                              |

|                                |                                                                                          |
|--------------------------------|------------------------------------------------------------------------------------------|
| Structure solution program     | SHELXS-97 (Sheldrick, 1997)                                                              |
| Refinement method              | Full-matrix least-squares on $F^2$                                                       |
| Refinement program             | SHELXL-97 (Sheldrick, 1997)                                                              |
| Function minimized             | $\Sigma w(F_o^2 - F_c^2)^2$                                                              |
| Data / restraints / parameters | 4293 / 0 / 379                                                                           |
| Goodness-of-fit on $F^2$       | 1.035                                                                                    |
| $\Delta/\sigma_{\max}$         | 0.001                                                                                    |
| Final R indices                | 3909 data; $I > 2\sigma(I)$ <span style="float: right;">R1 = 0.0266, wR2 = 0.0652</span> |
|                                | all data <span style="float: right;">R1 = 0.0298, wR2 = 0.0673</span>                    |
| Weighting scheme               | $w = 1/[\sigma^2(F_o^2) + (0.0287P)^2 + 9.6428P]$<br>where $P = (F_o^2 + 2F_c^2)/3$      |
| Largest diff. peak and hole    | 0.567 and -0.351 $\text{e}\text{\AA}^{-3}$                                               |
| R.M.S. deviation from mean     | 0.057 $\text{e}\text{\AA}^{-3}$                                                          |

**Table S13.** Crystal data and structure refinement for **2m**.

|                                 |                                                                                                                                                                                                                                                                                                     |
|---------------------------------|-----------------------------------------------------------------------------------------------------------------------------------------------------------------------------------------------------------------------------------------------------------------------------------------------------|
| Chemical formula                | $\text{C}_8\text{H}_8\text{F}_6\text{N}_2\text{O}_4\text{S}_2$                                                                                                                                                                                                                                      |
| Formula weight                  | 374.28                                                                                                                                                                                                                                                                                              |
| Wavelength                      | 0.71073 $\text{\AA}$                                                                                                                                                                                                                                                                                |
| Crystal size                    | 0.120 x 0.150 x 0.190 mm                                                                                                                                                                                                                                                                            |
| Crystal system                  | monoclinic                                                                                                                                                                                                                                                                                          |
| Space group                     | C 1 c 1                                                                                                                                                                                                                                                                                             |
| Unit cell dimensions            | $a = 14.813(3) \text{\AA}$ <span style="float: right;"><math>\alpha = 90^\circ</math></span><br>$b = 10.590(2) \text{\AA}$ <span style="float: right;"><math>\beta = 120.578(3)^\circ</math></span><br>$c = 10.069(2) \text{\AA}$ <span style="float: right;"><math>\gamma = 90^\circ</math></span> |
| Volume                          | 1359.9(5) $\text{\AA}^3$                                                                                                                                                                                                                                                                            |
| Z                               | 4                                                                                                                                                                                                                                                                                                   |
| Density (calculated)            | 1.828 $\text{g}/\text{cm}^3$                                                                                                                                                                                                                                                                        |
| Absorption coefficient          | 0.482 $\text{mm}^{-1}$                                                                                                                                                                                                                                                                              |
| $F(000)$                        | 752                                                                                                                                                                                                                                                                                                 |
| Theta range for data collection | 2.50 to $25.01^\circ$                                                                                                                                                                                                                                                                               |
| Index ranges                    | $-17 \leq h \leq 11$ , $-12 \leq k \leq 12$ , $-11 \leq l \leq 11$                                                                                                                                                                                                                                  |
| Reflections collected           | 3133                                                                                                                                                                                                                                                                                                |
| Independent reflections         | 1717 [ $R(\text{int}) = 0.0146$ ]                                                                                                                                                                                                                                                                   |

|                                     |                                                                                     |                           |
|-------------------------------------|-------------------------------------------------------------------------------------|---------------------------|
| Coverage of independent reflections | 99.8%                                                                               |                           |
| Absorption correction               | numerical                                                                           |                           |
| Max. and min. transmission          | 0.9444 and 0.9140                                                                   |                           |
| Structure solution technique        | direct methods                                                                      |                           |
| Structure solution program          | SHELXS-97 (Sheldrick, 1997)                                                         |                           |
| Refinement method                   | Full-matrix least-squares on $F^2$                                                  |                           |
| Refinement program                  | SHELXL-97 (Sheldrick, 1997)                                                         |                           |
| Function minimized                  | $\Sigma w(F_o^2 - F_c^2)^2$                                                         |                           |
| Data / restraints / parameters      | 1717 / 2 / 200                                                                      |                           |
| Goodness-of-fit on $F^2$            | 1.051                                                                               |                           |
| Final R indices                     | 1690 data; $I > 2\sigma(I)$                                                         | R1 = 0.0207, wR2 = 0.0513 |
|                                     | all data                                                                            | R1 = 0.0213, wR2 = 0.0517 |
| Weighting scheme                    | $w = 1/[\sigma^2(F_o^2) + (0.0252P)^2 + 1.1742P]$<br>where $P = (F_o^2 + 2F_c^2)/3$ |                           |
| Absolute structure parameter        | 0.2(1)                                                                              |                           |
| Largest diff. peak and hole         | 0.297 and -0.245 $e\text{\AA}^{-3}$                                                 |                           |
| R.M.S. deviation from mean          | 0.040 $e\text{\AA}^{-3}$                                                            |                           |

**Table S14.** Crystal data and structure refinement for **2n**.

|                        |                              |                            |
|------------------------|------------------------------|----------------------------|
| Chemical formula       | $C_{11}H_{14}F_6N_2O_4S_2$   |                            |
| Formula weight         | 416.36                       |                            |
| Wavelength             | 0.71073 $\text{\AA}$         |                            |
| Crystal size           | 0.140 x 0.230 x 0.310 mm     |                            |
| Crystal system         | monoclinic                   |                            |
| Space group            | P 1 21/c 1                   |                            |
| Unit cell dimensions   | $a = 11.1898(14) \text{\AA}$ | $\alpha = 90^\circ$        |
|                        | $b = 12.4495(15) \text{\AA}$ | $\beta = 107.577(2)^\circ$ |
|                        | $c = 12.4571(15) \text{\AA}$ | $\gamma = 90^\circ$        |
| Volume                 | 1654.3(3) $\text{\AA}^3$     |                            |
| Z                      | 4                            |                            |
| Density (calculated)   | 1.672 $\text{g/cm}^3$        |                            |
| Absorption coefficient | 0.406 $\text{mm}^{-1}$       |                            |
| F(000)                 | 848                          |                            |

|                                     |                                             |                           |
|-------------------------------------|---------------------------------------------|---------------------------|
| Theta range for data collection     | 2.37 to 25.02°                              |                           |
| Index ranges                        | -10<=h<=13, -13<=k<=14, -14<=l<=14          |                           |
| Reflections collected               | 7856                                        |                           |
| Independent reflections             | 2921 [R(int) = 0.0165]                      |                           |
| Coverage of independent reflections | 99.8%                                       |                           |
| Absorption correction               | numerical                                   |                           |
| Max. and min. transmission          | 0.9454 and 0.8846                           |                           |
| Structure solution technique        | direct methods                              |                           |
| Structure solution program          | SHELXS-97 (Sheldrick, 1997)                 |                           |
| Refinement method                   | Full-matrix least-squares on F <sup>2</sup> |                           |
| Refinement program                  | SHELXL-97 (Sheldrick, 1997)                 |                           |
| Function minimized                  | $\Sigma w(F_o^2 - F_c^2)^2$                 |                           |
| Data / restraints / parameters      | 2921 / 3 / 227                              |                           |
| Goodness-of-fit on F <sup>2</sup>   | 1.006                                       |                           |
| Final R indices                     | 2716 data; I>2σ(I)                          | R1 = 0.0288, wR2 = 0.0738 |
|                                     | all data                                    | R1 = 0.0310, wR2 = 0.0754 |
| Weighting scheme                    | $w=1/[\sigma^2(F_o^2)+(0.0389P)^2+1.4223P]$ |                           |
|                                     | where $P=(F_o^2+2F_c^2)/3$                  |                           |
| Largest diff. peak and hole         | 0.506 and -0.339 eÅ <sup>-3</sup>           |                           |
| R.M.S. deviation from mean          | 0.050 eÅ <sup>-3</sup>                      |                           |

## 6. $^1\text{H}$ and $^{13}\text{C}$ NMR spectra of all products

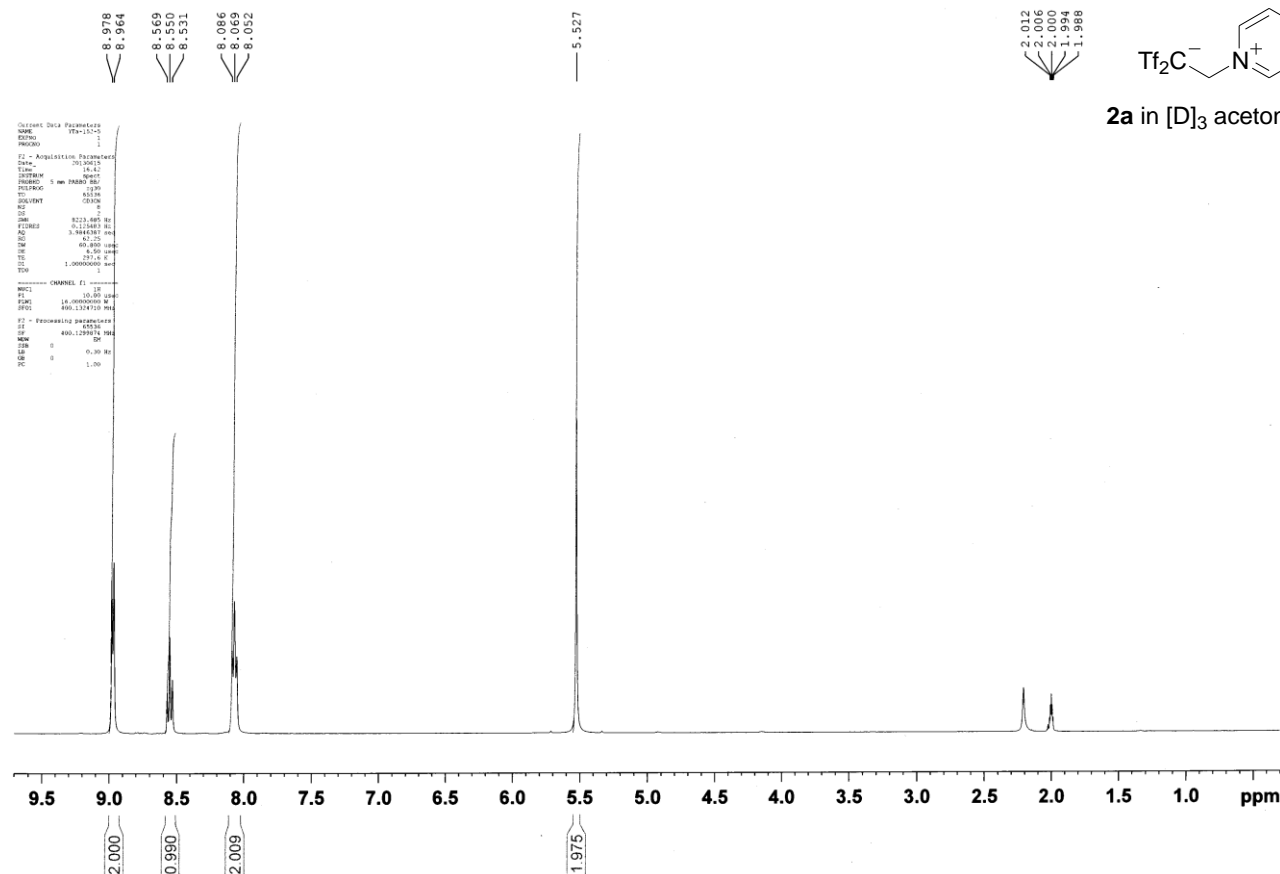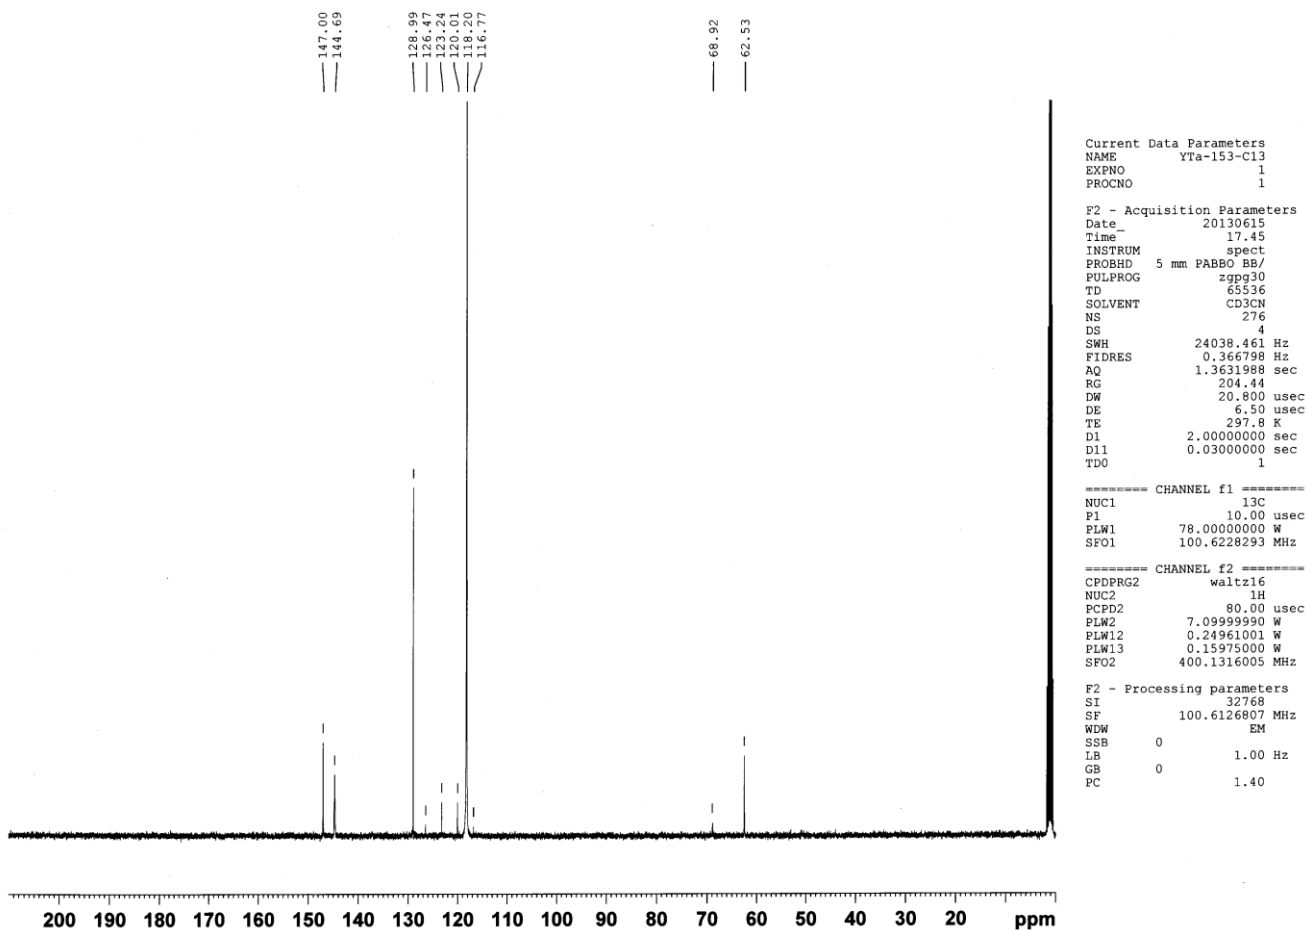

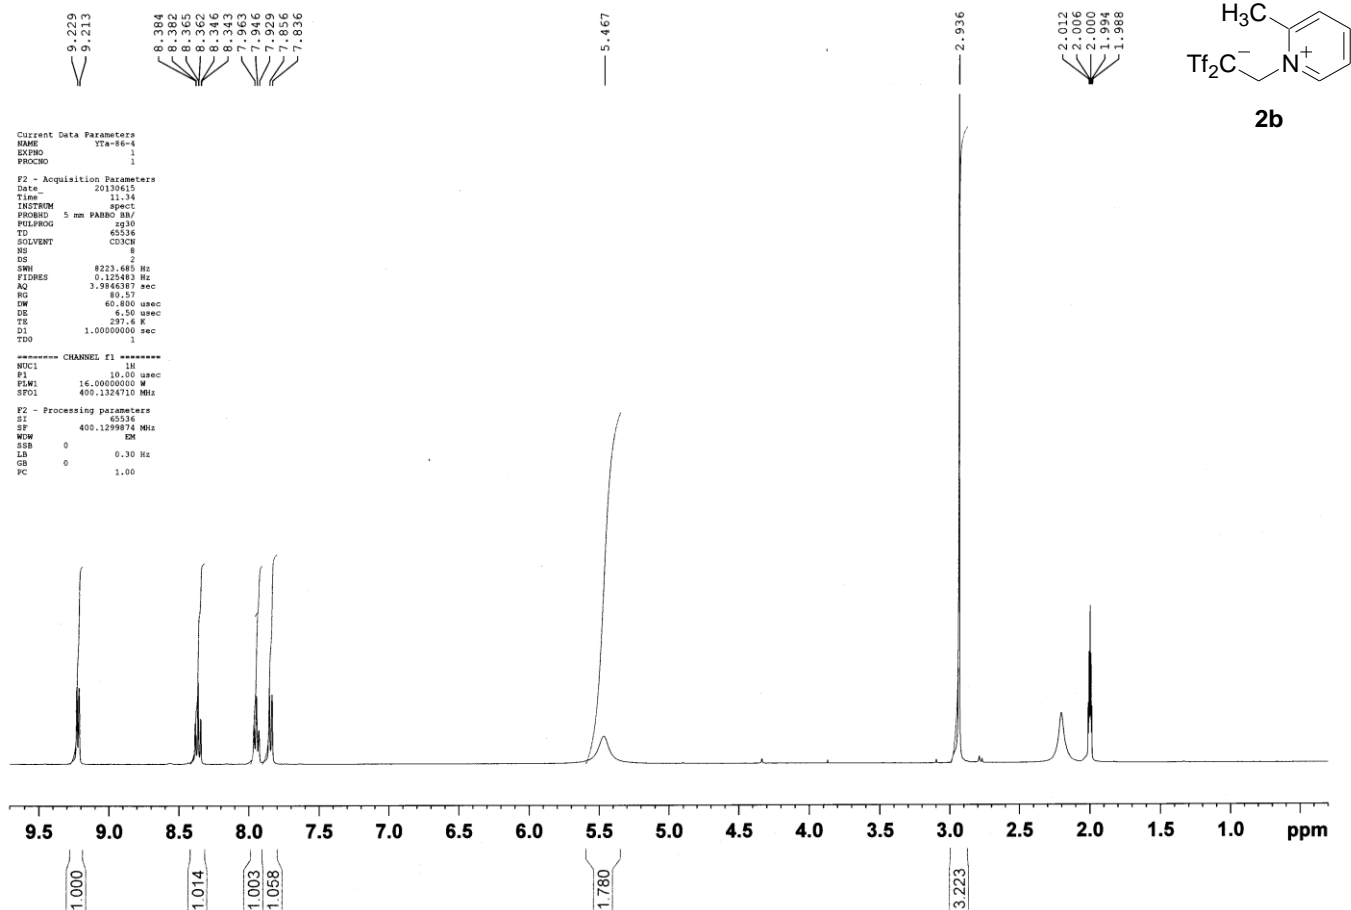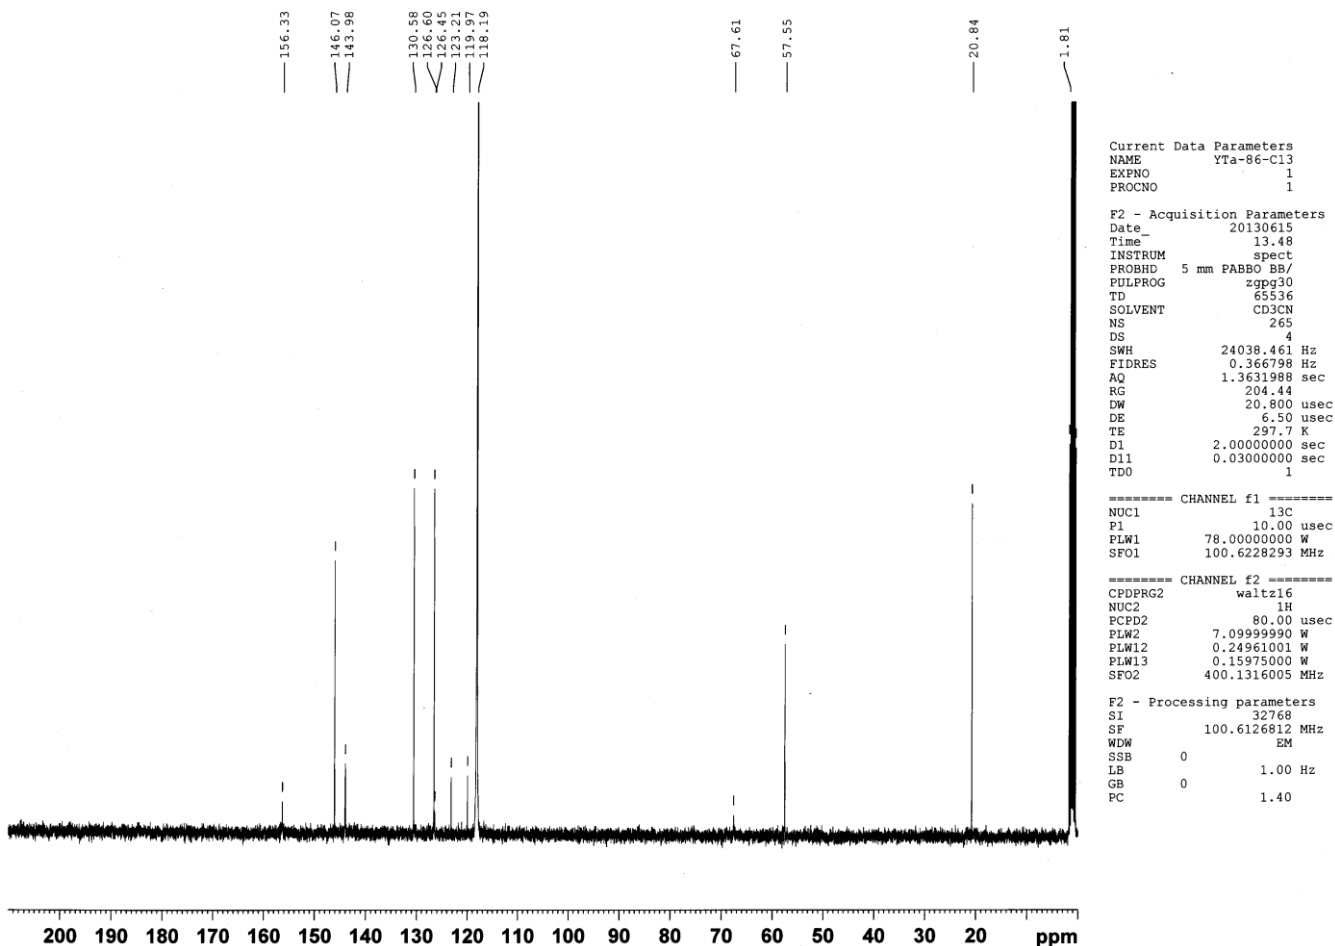

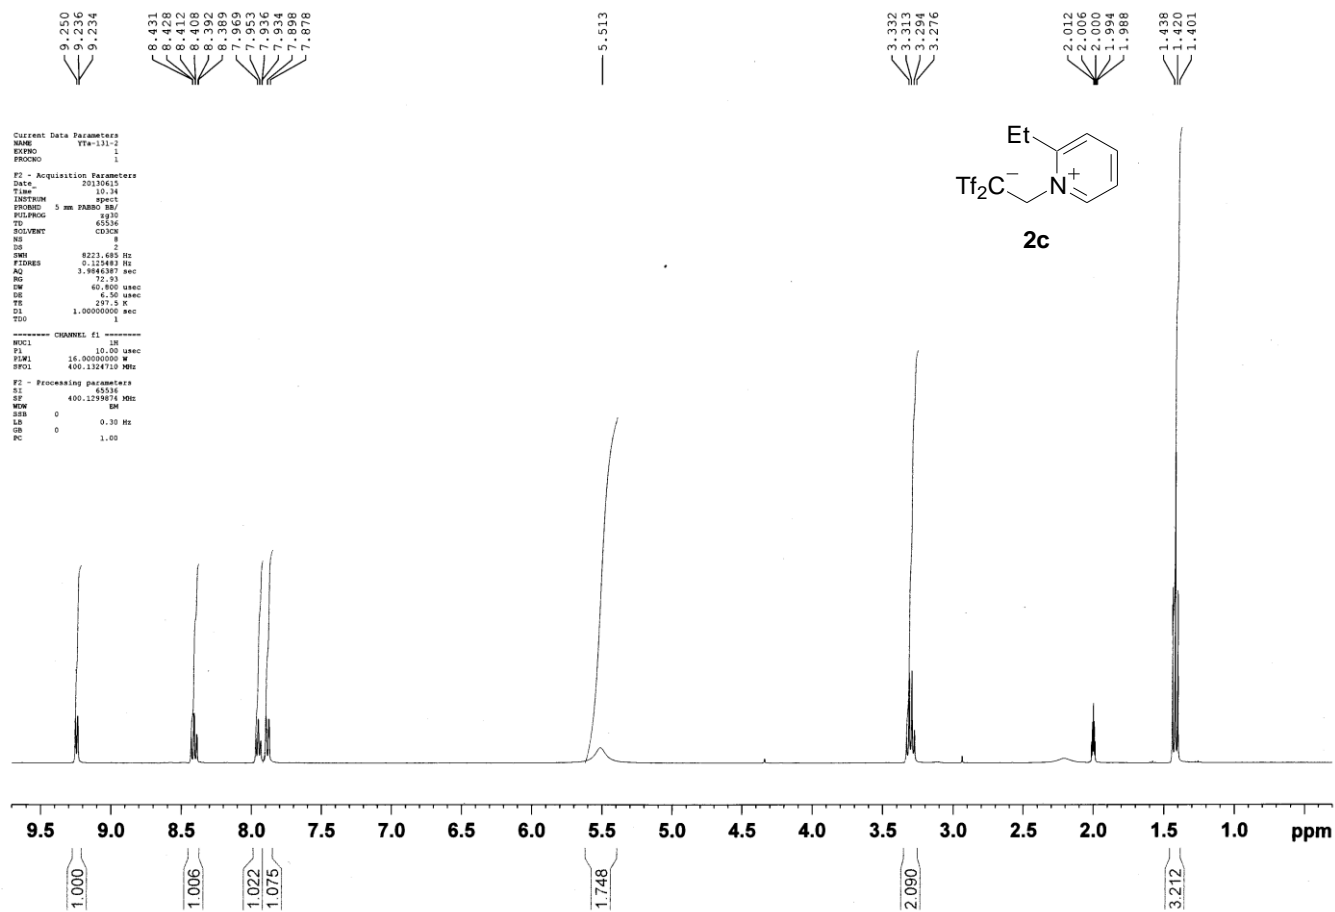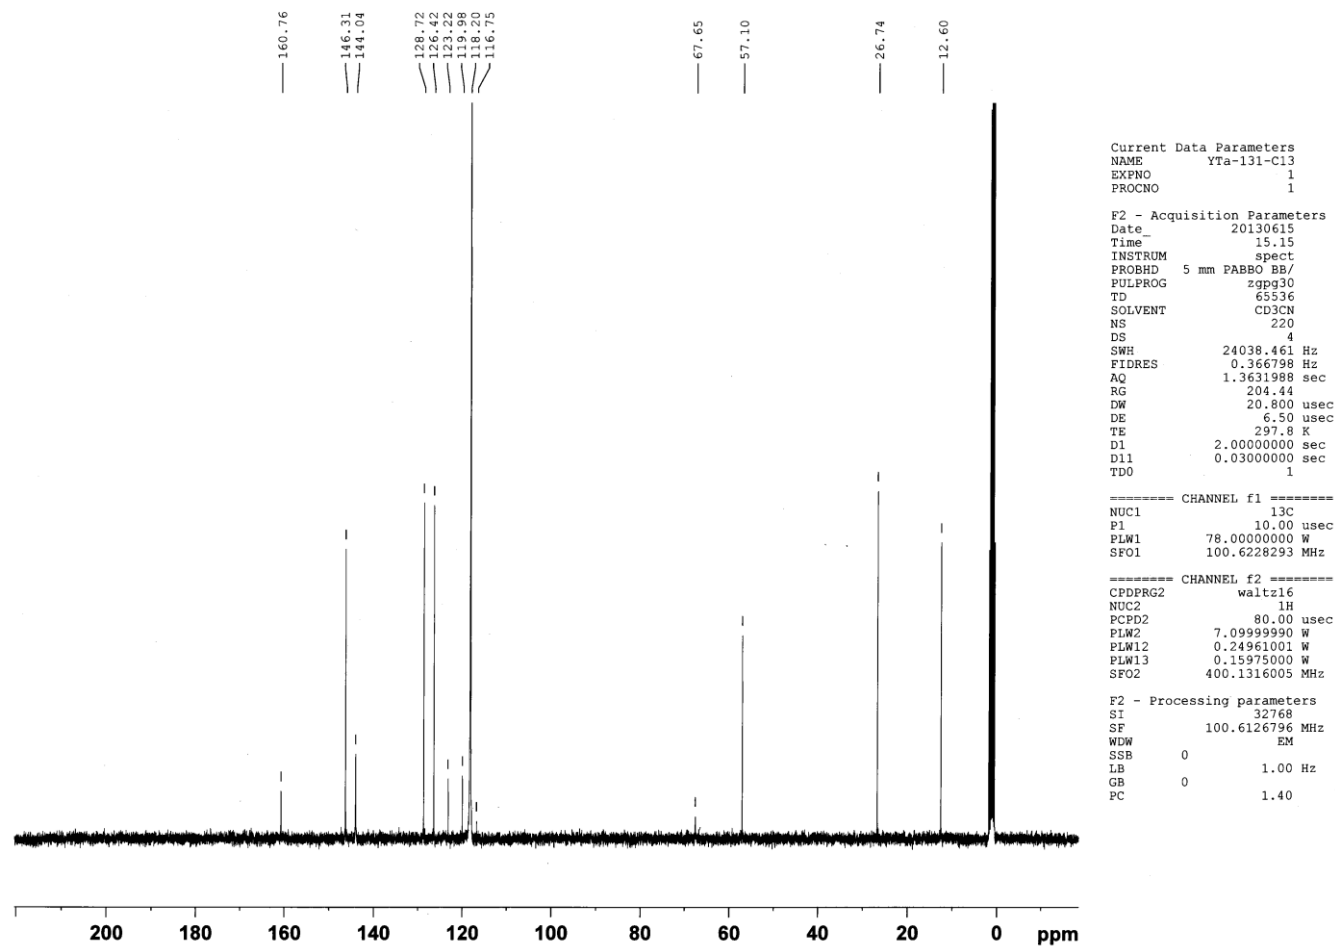

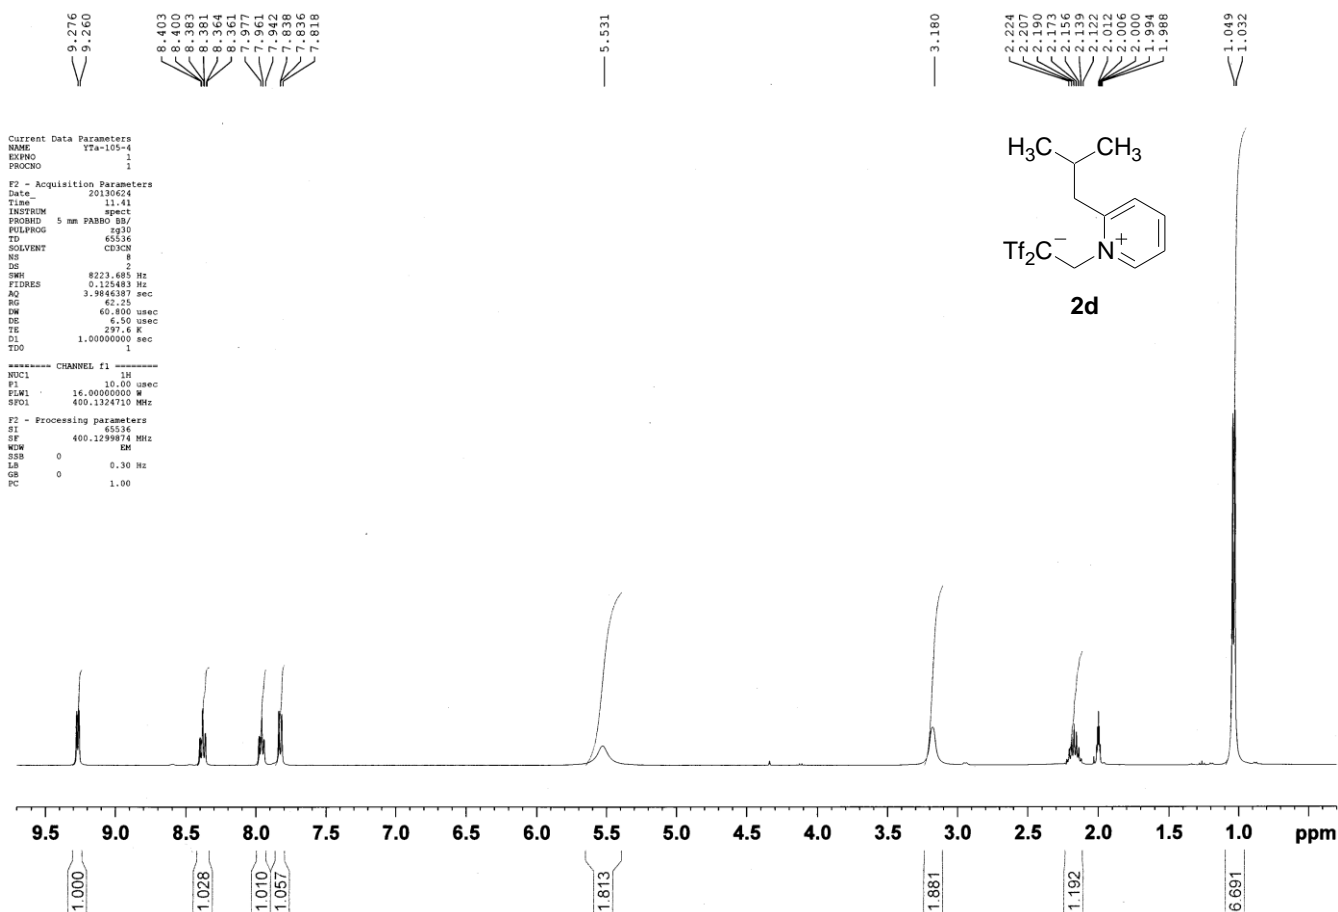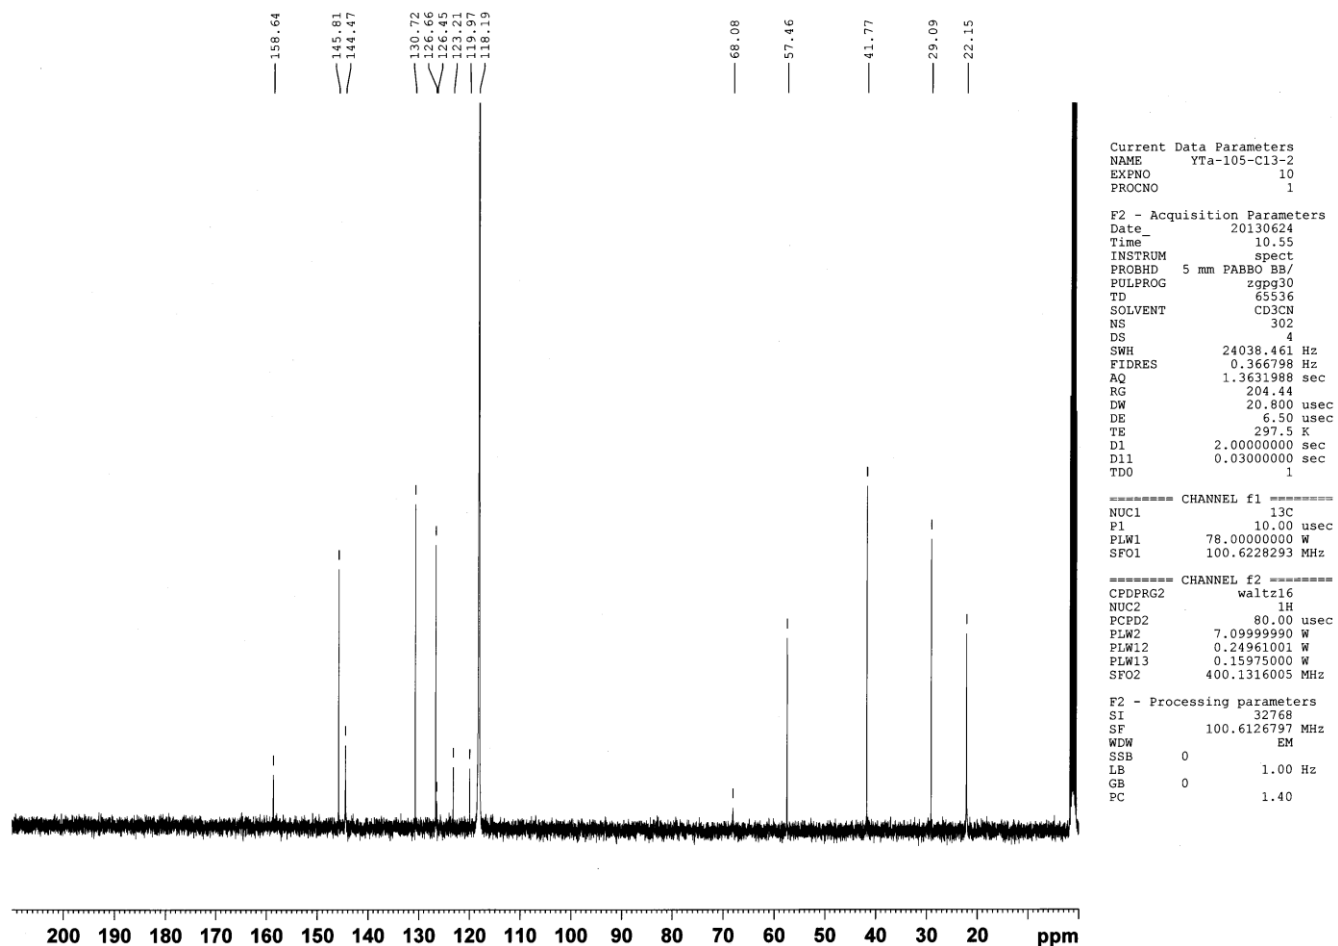

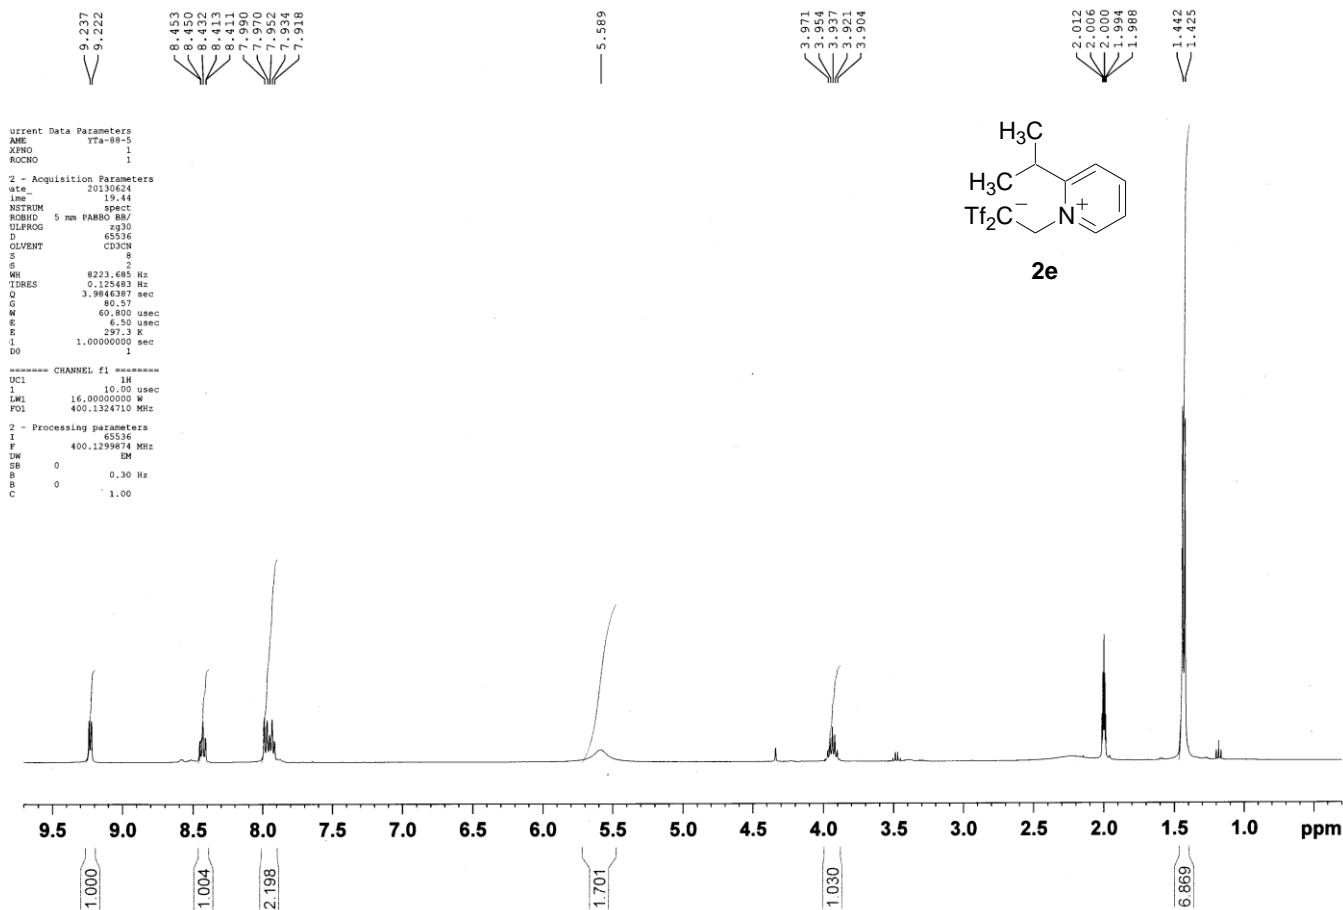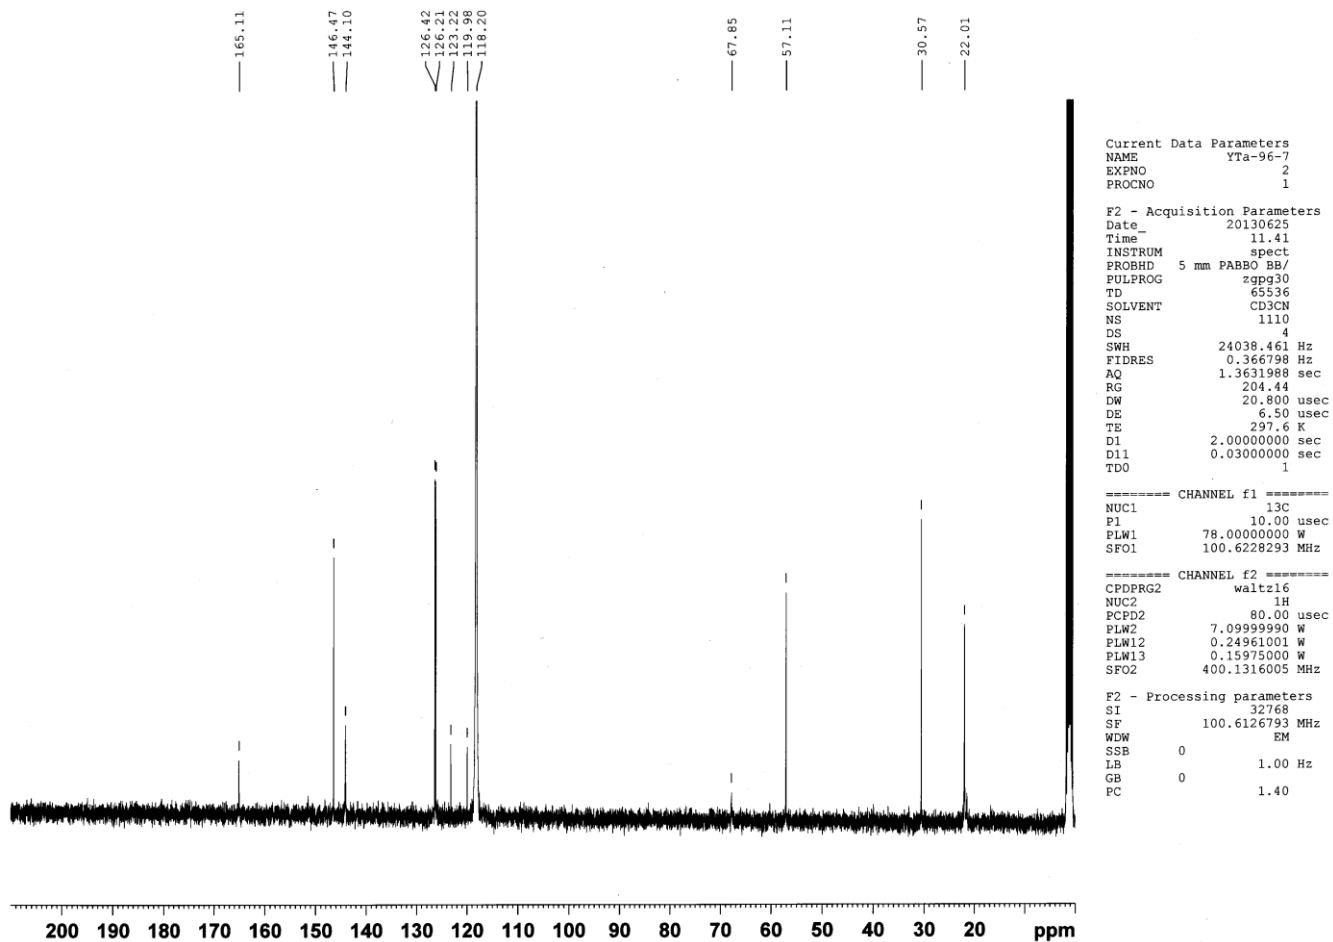

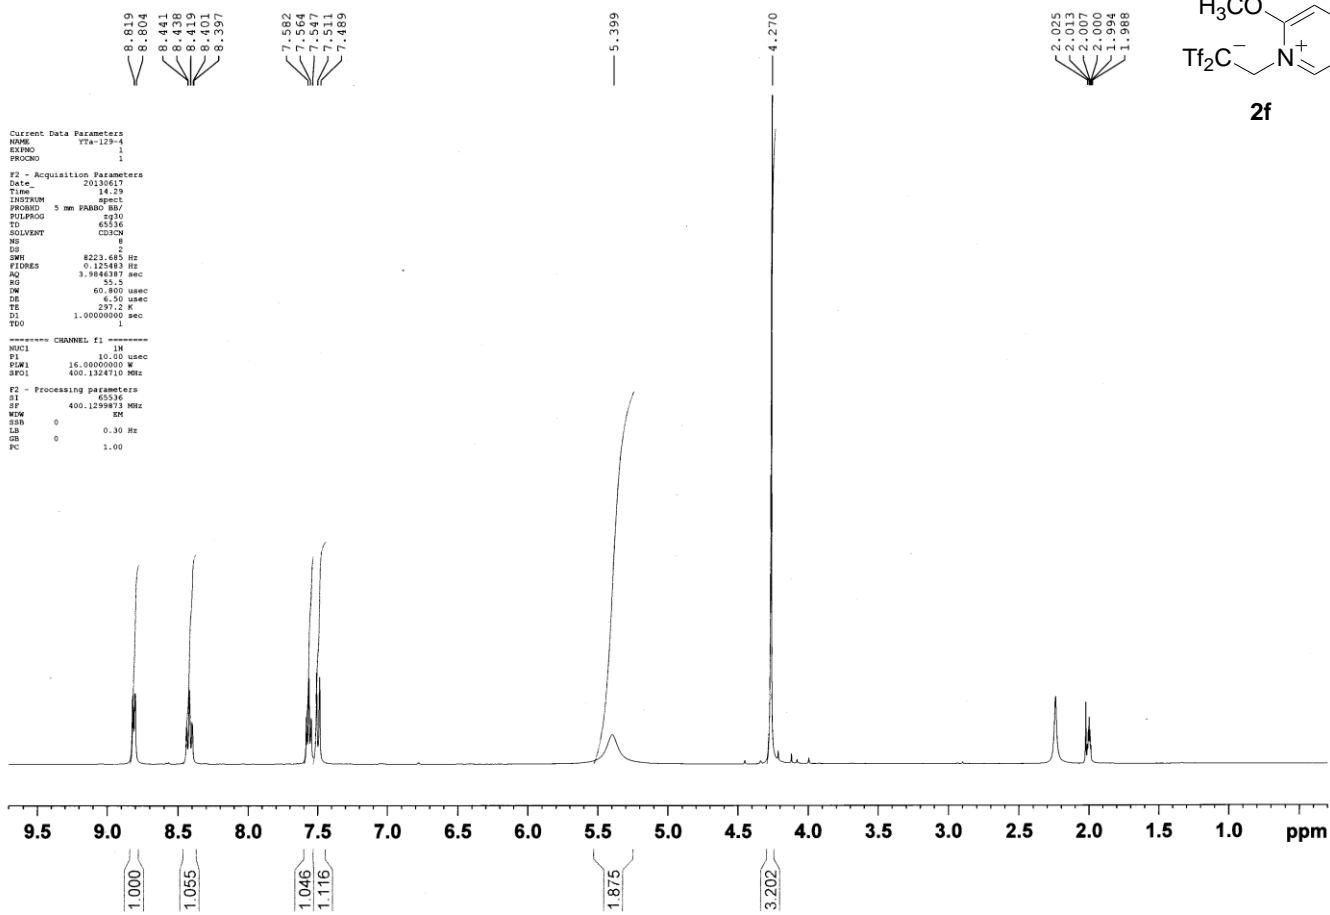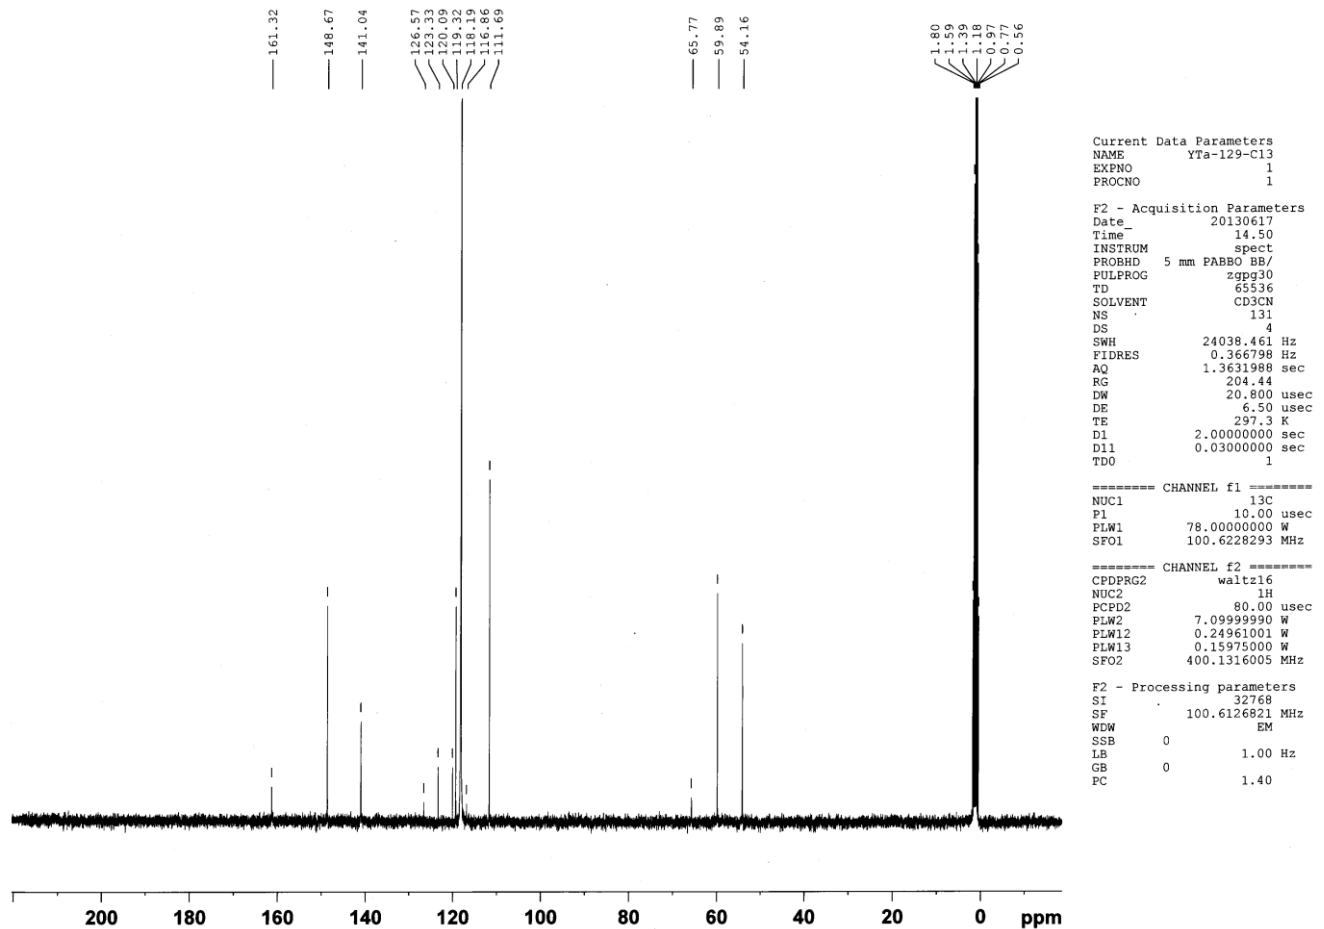

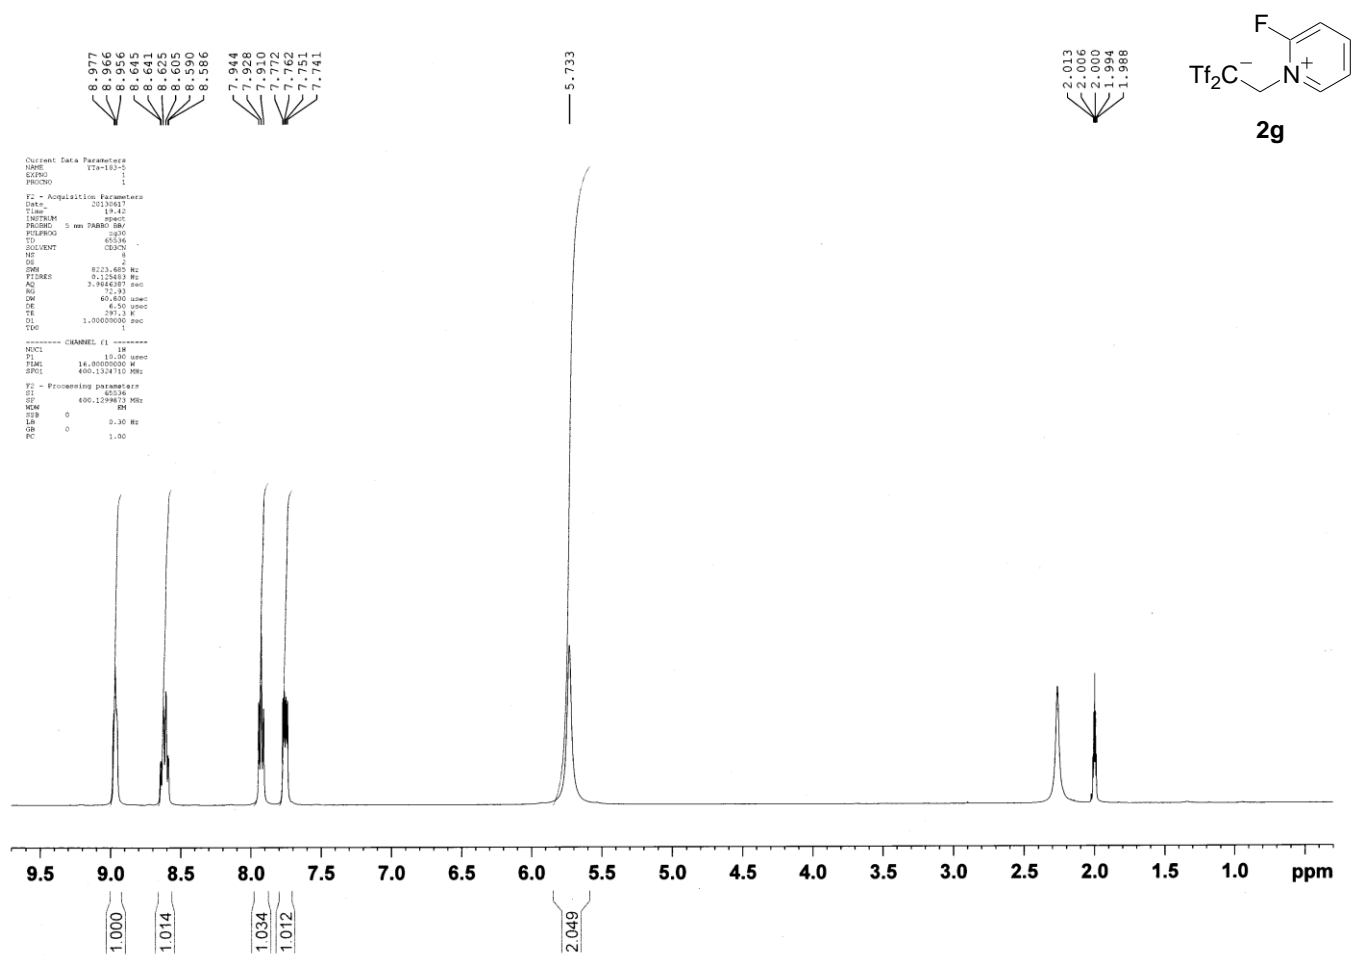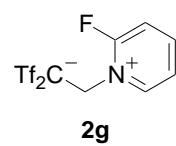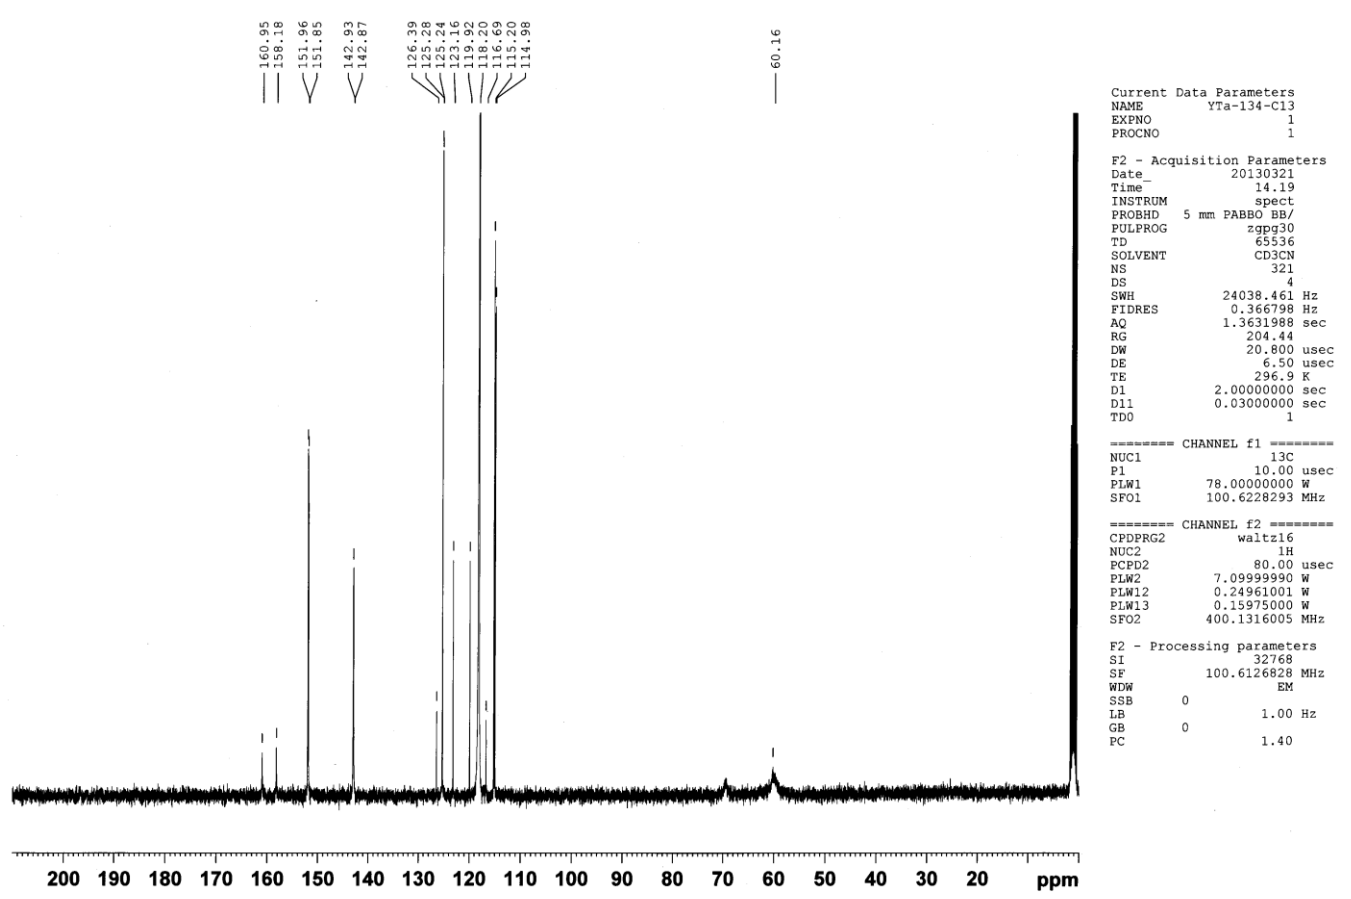

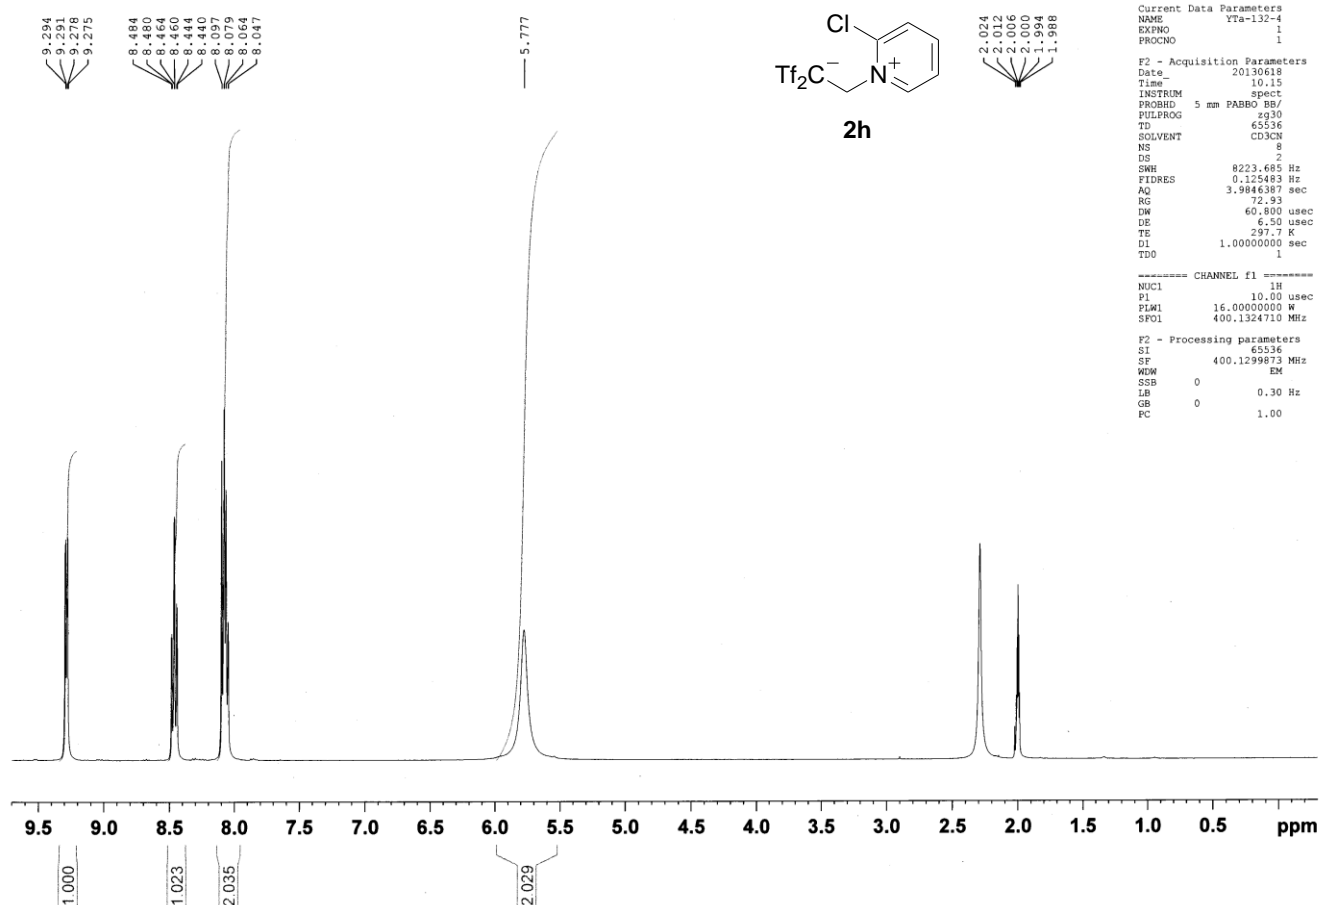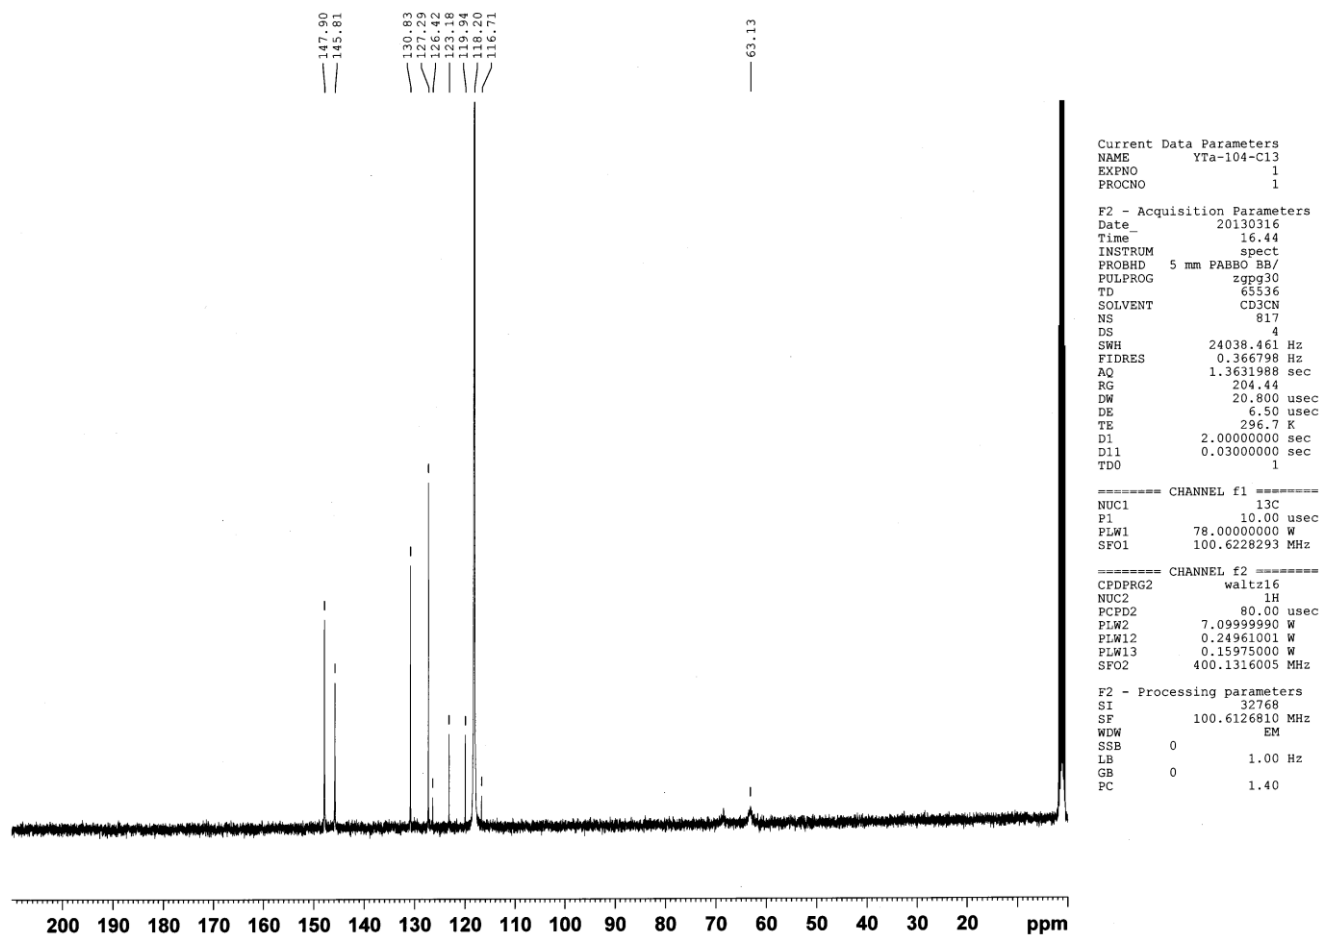

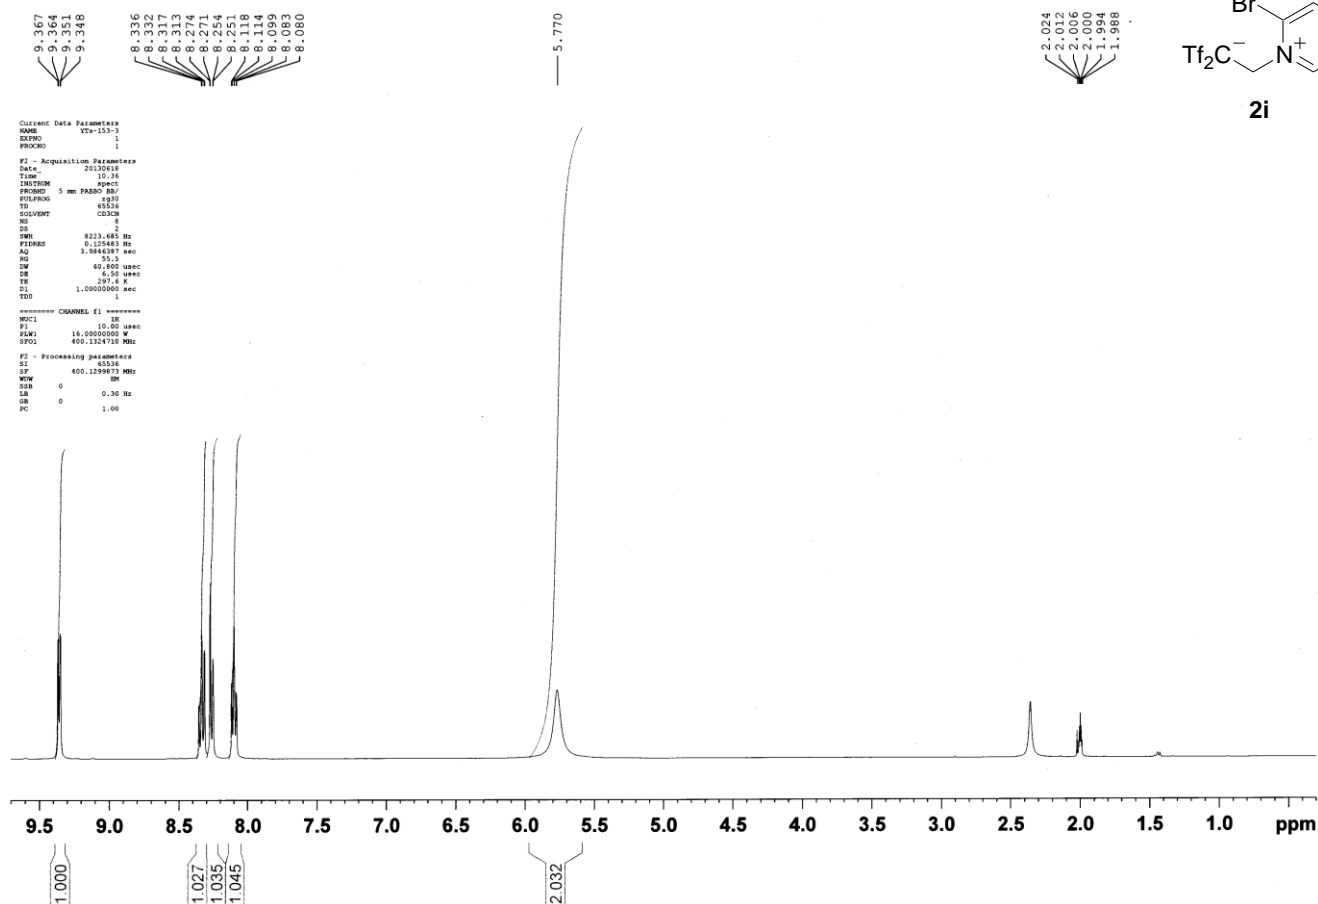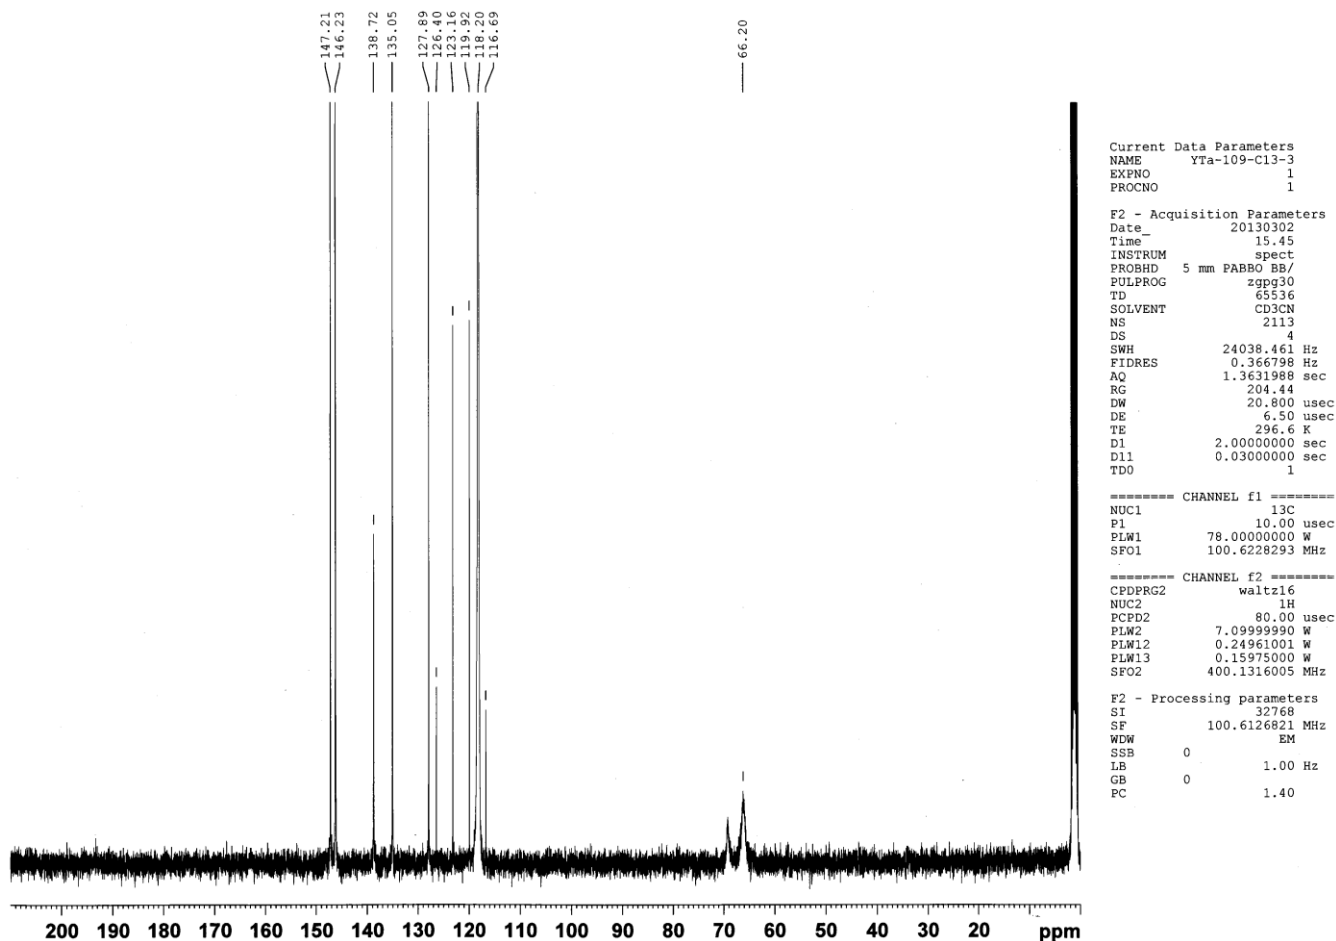

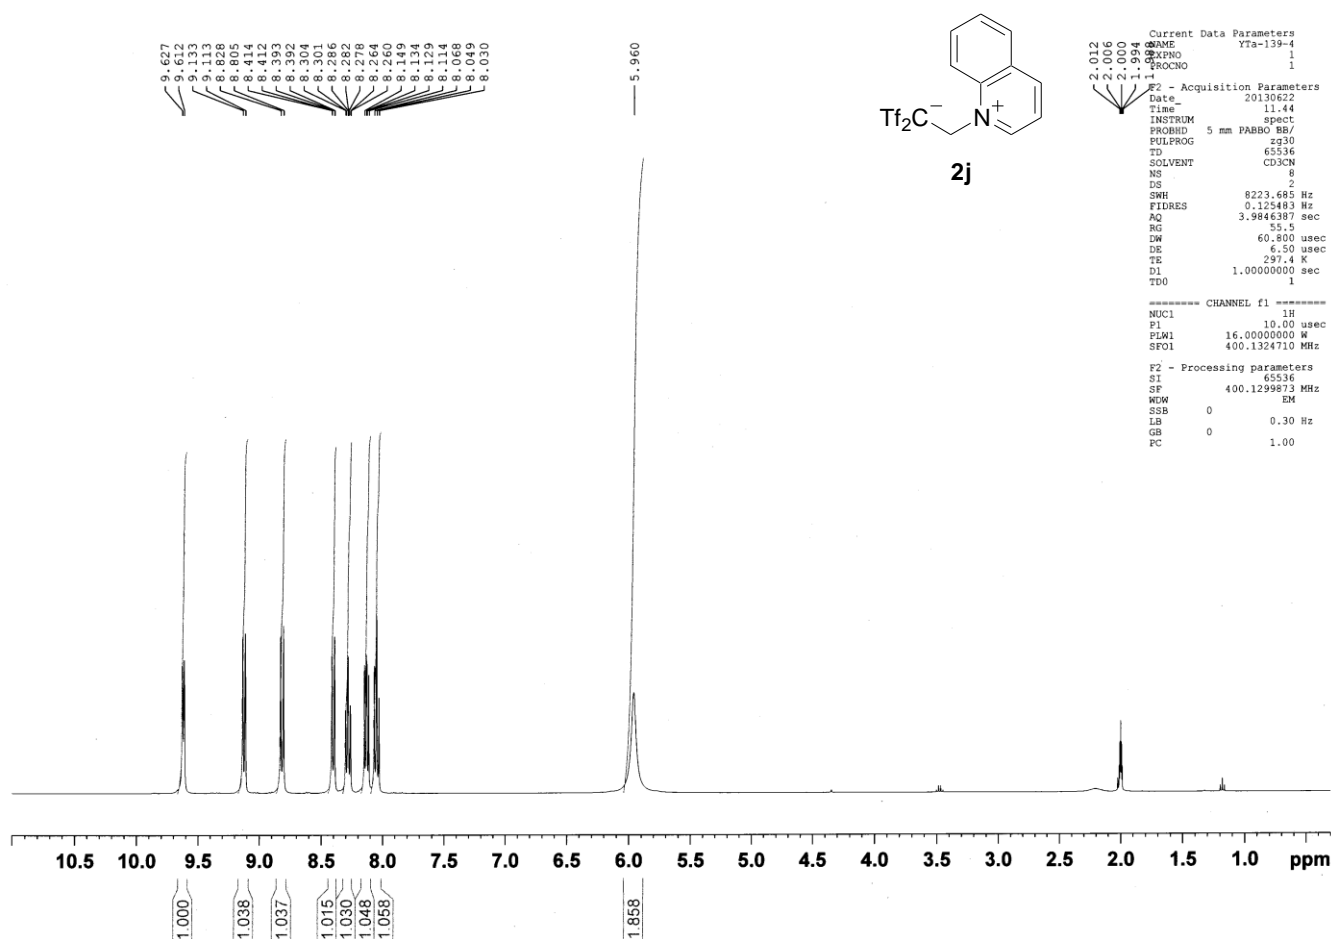

```

Current Data Parameters
NAME      YTa-139-4
EXPNO     1
PROCNO    1

F2 - Acquisition Parameters
Date_     20130622
Time      11.44
INSTRUM   spect
PROBHD    5 mm PABBO BB/
PULPROG   zg30
TD         65536
SOLVENT   CD3CN
NS         8
DS         2
SWH        8223.685 Hz
FIDRES     0.125483 Hz
AQ         3.9846387 sec
RG         35.5
DW         60.800 usec
DE         6.50 usec
TE         297.4 K
D1         1.00000000 sec
D11        1
TD0        1

===== CHANNEL f1 =====
NUC1       1H
P1         10.00 usec
PLW1       16.00000000 W
SFO1       400.1324710 MHz

F2 - Processing parameters
SI         65536
SF         400.1299873 MHz
WDW        EM
SSB        0
LB         0.30 Hz
GB         0
PC         1.00
  
```

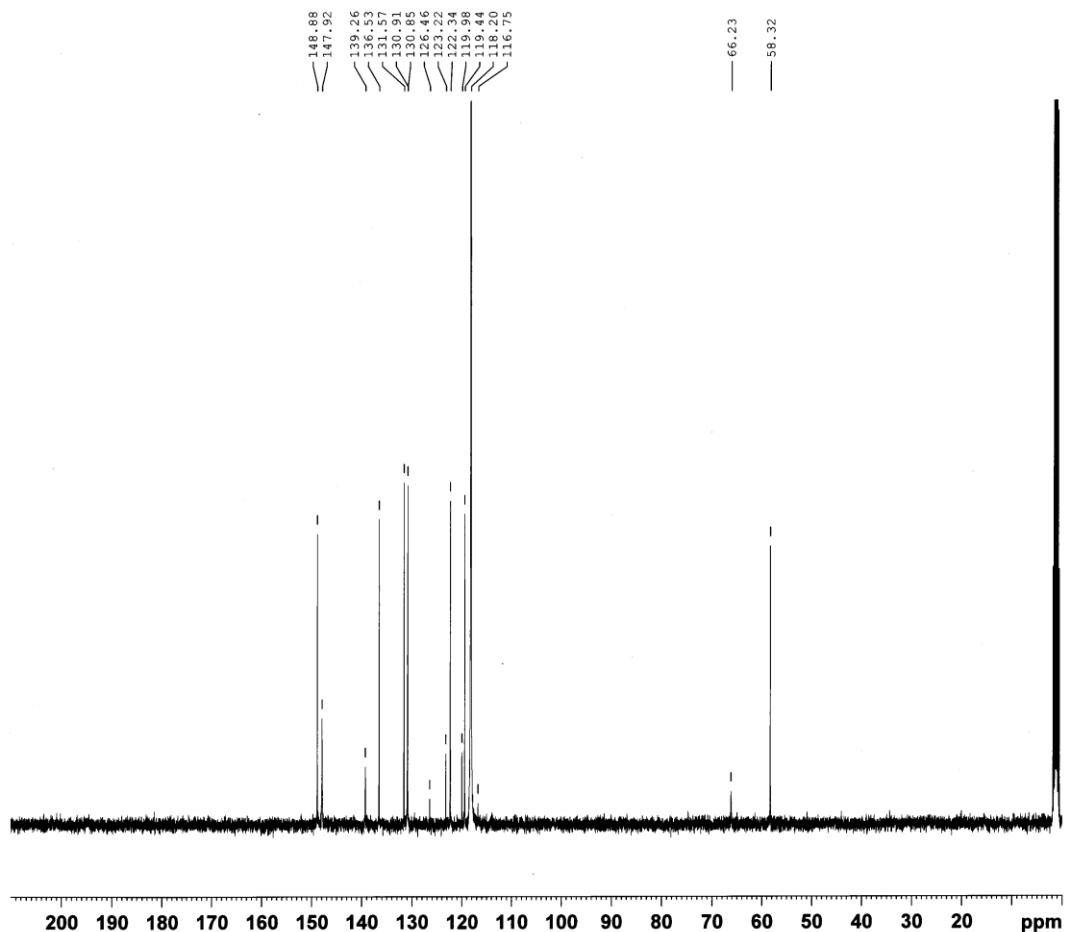

```

Current Data Parameters
NAME      YTa-99-C13
EXPNO     1
PROCNO    1

F2 - Acquisition Parameters
Date_     20130220
Time      14.00
INSTRUM   spect
PROBHD    5 mm PABBO BB/
PULPROG   zgpg30
TD         65536
SOLVENT   CD3CN
NS         253
DS         4
SWH        24038.461 Hz
FIDRES     0.366798 Hz
AQ         1.3631988 sec
RG         204.44
DW         20.800 usec
DE         6.50 usec
TE         296.0 K
D1         2.00000000 sec
D11        0.03000000 sec
TD0        1

===== CHANNEL f1 =====
NUC1       13C
P1         10.00 usec
PLW1       78.00000000 W
SFO1       100.6228293 MHz

===== CHANNEL f2 =====
CPDPRG2   waltz16
NUC2       1H
PCPD2      80.00 usec
PLW2       7.09999990 W
PLW12      0.24961001 W
PLW13      0.15975000 W
SFO2       400.1316005 MHz

F2 - Processing parameters
SI         32768
SF         100.6126822 MHz
WDW        EM
SSB        0
LB         1.00 Hz
GB         0
PC         1.40
  
```

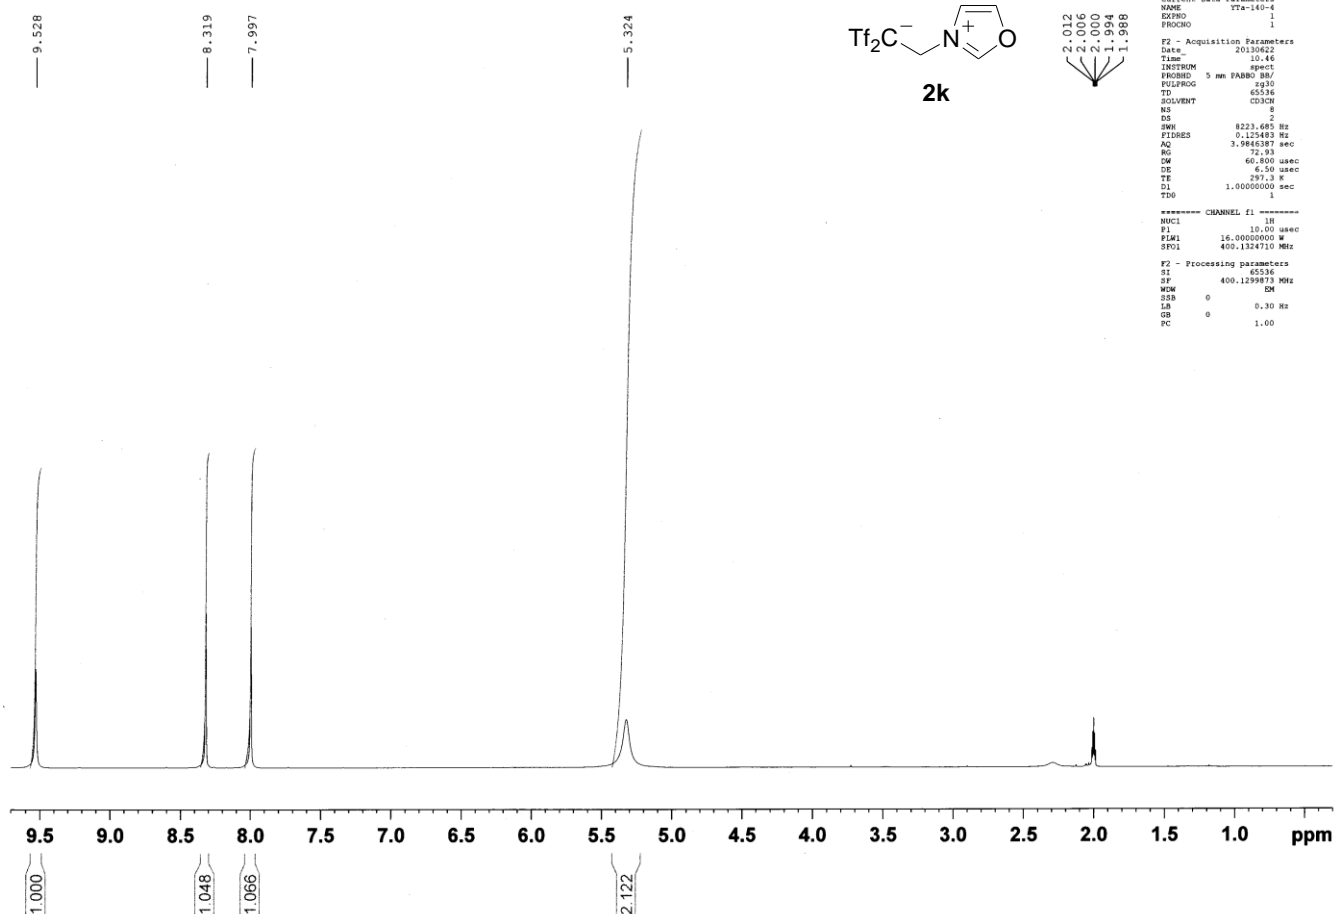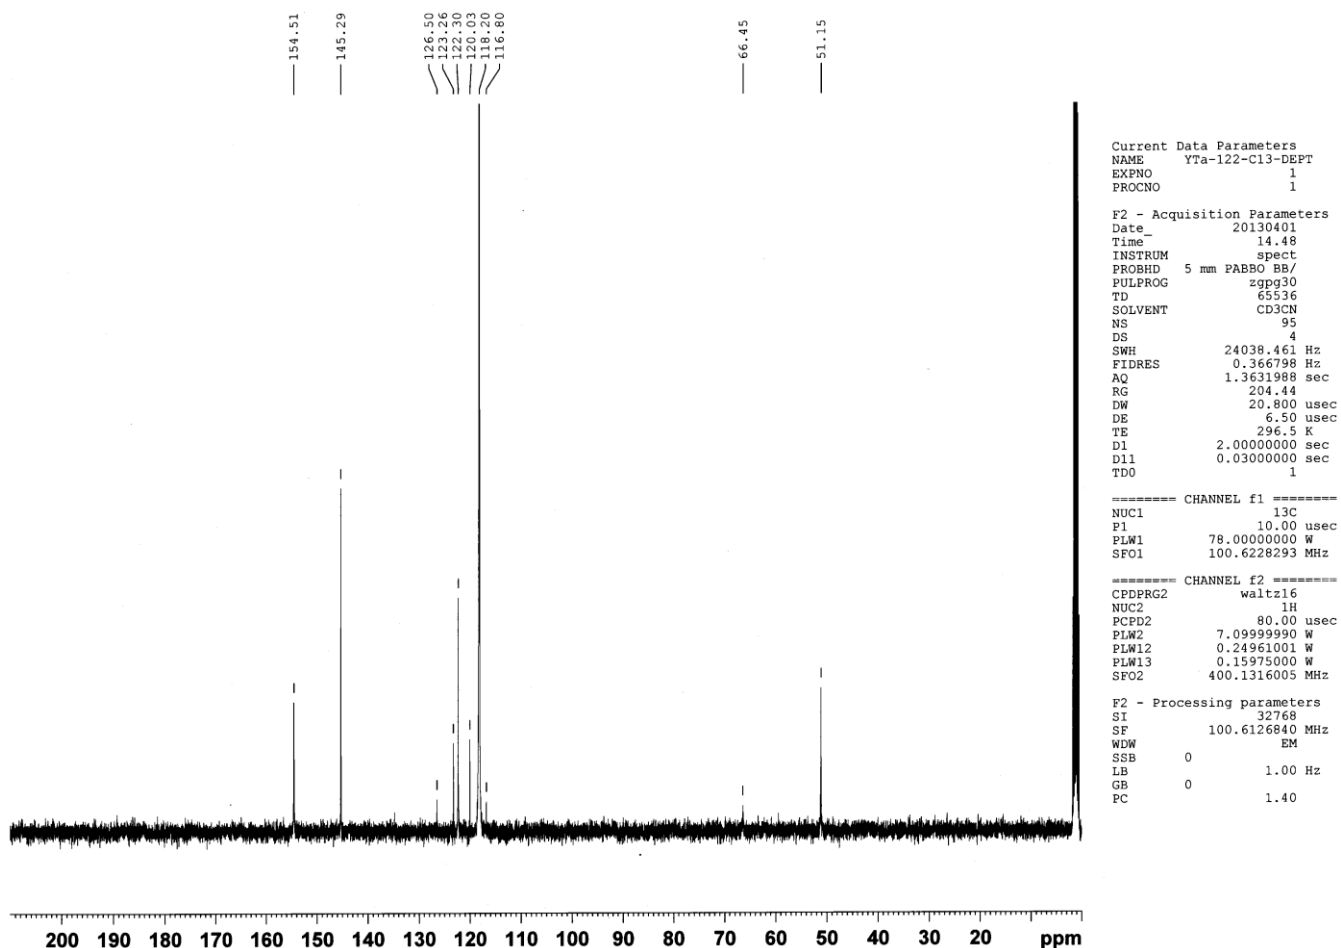

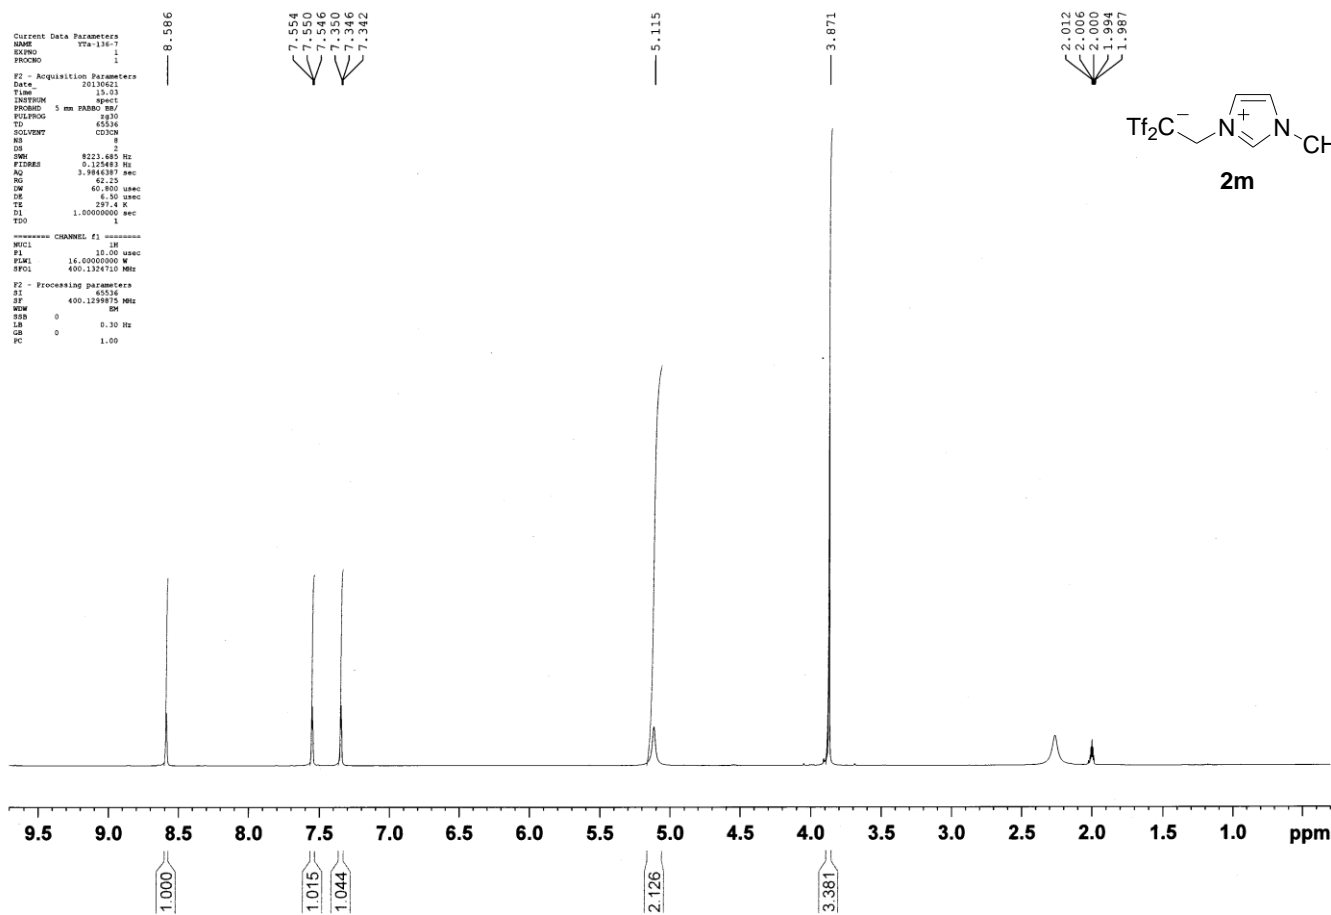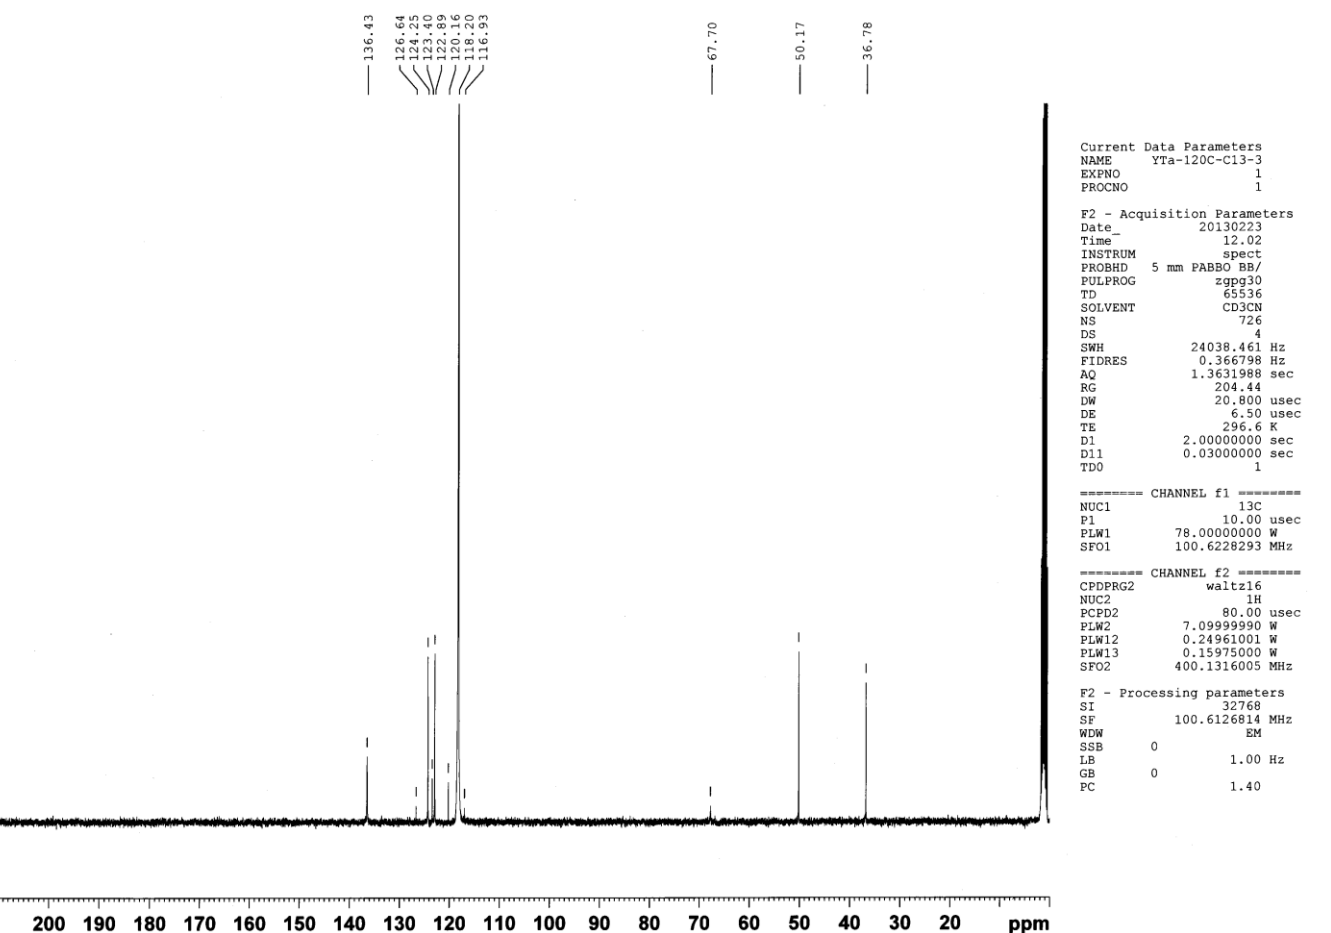

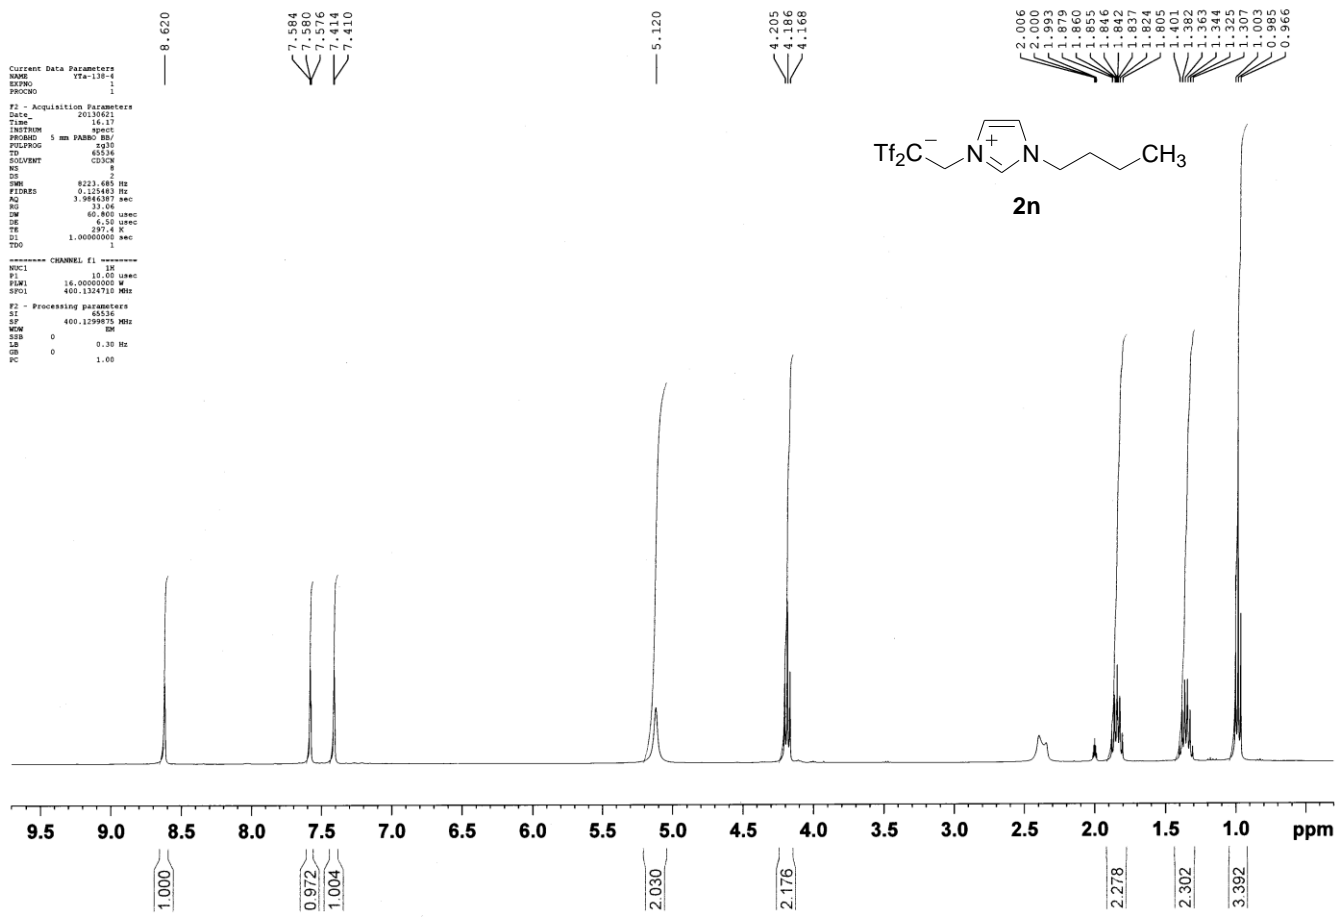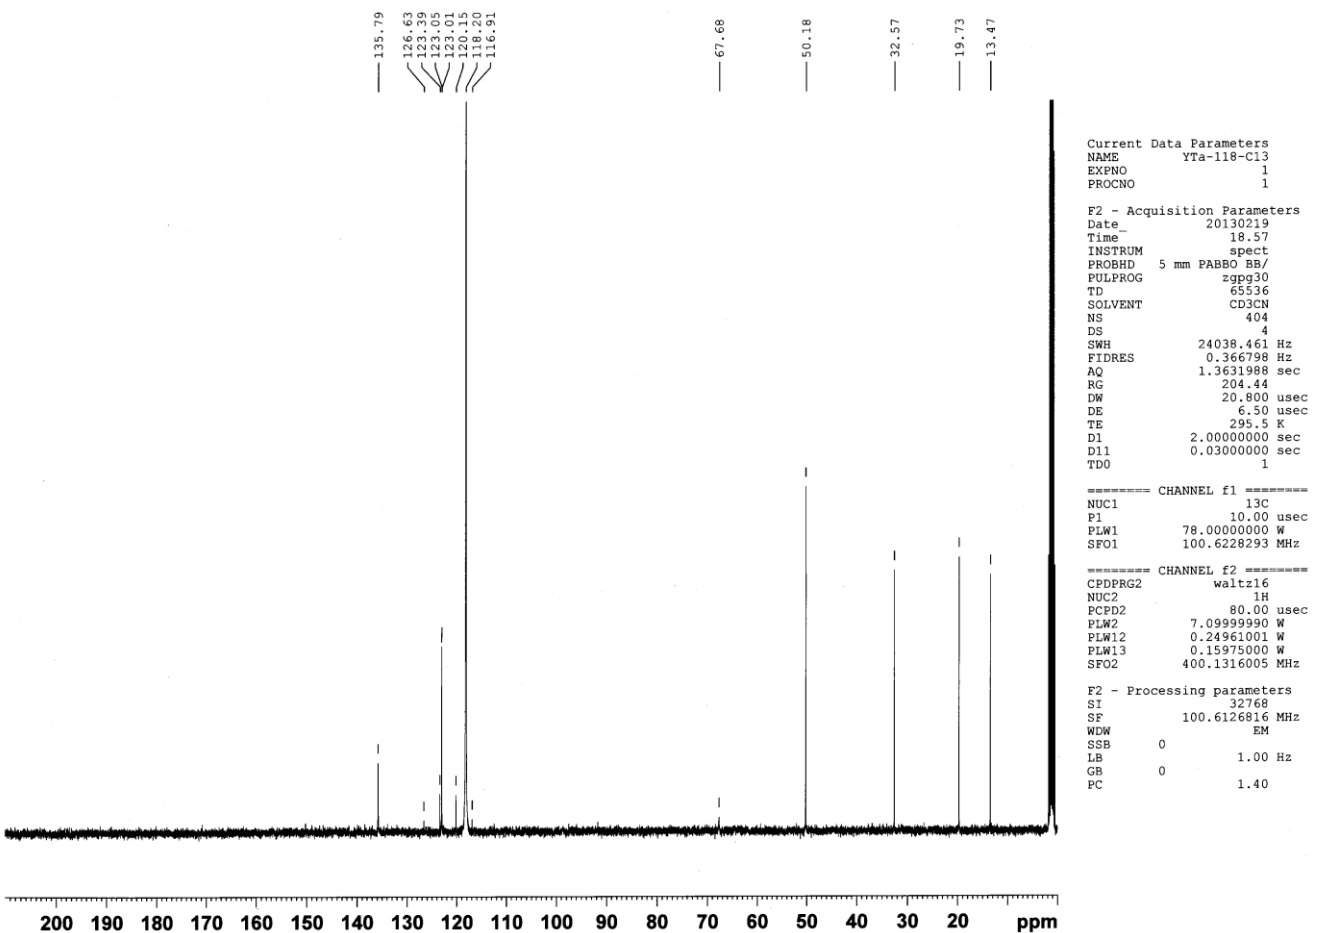

## 7. References

1. (a) Waller, F. J.; Barrett, A. G. M., Braddock, D. C.; Ramprasad, D.; McKinnell, R. M.; White, A. J. P.; Williams, D. J.; Ducray, R. J. *J. Org. Chem.* **1999**, *64*, 2910. (b) Yanai, H.; Takahashi, A.; Taguchi, T. *Tetrahedron* **2007**, *63*, 12149.
2. Yanai, H.; Ogura, H.; Fukaya, H.; Kotani, A.; Kusu, F.; Taguchi, T. *Chem.–Eur. J.* **2011**, *17*, 11747.
3. Schmidt, M. W.; Baldrige, K. K.; Elbert, G. M. S.; Jensen, J. H.; Koseki, S.; Matsunaga, N.; Nguyen, K. A.; Su, S. J.; Windus, T. L.; Dupuis, M.; Montgomery, J. M. *J. Comput. Chem.* **1993**, *14*, 1347.
4. (a) NBO 5.G: E. D. Glendening, J. K. Badenhoop, A. E. Reed, J. E. Carpenter, J. A. Bohmann, C. M. Morales, F. Weinhold, Theoretical Chemistry Institute, University of Wisconsin, Madison, WI, 2004; <http://www.chem.wisc.edu/~nbo5>. (b) Weinhold, F.; Clark, L., *Valence and Bonding. A Natural Bond Orbital Donor-Acceptor Perspective*; Cambridge University Press: Cambridge, UK, 2005.
